1     **Postsynaptic Pannexin-1 Facilitates Anandamide Uptake to Modulate Glutamate**  
2                     **Release and Enhance Network Excitability**

3  
4     Jennifer Bialecki<sup>1</sup>, Nicholas L. Weilinger<sup>1</sup>, Alexander W. Lohman<sup>1</sup>, Haley A. Vecchiarelli<sup>1</sup>,  
5     Jordan H.B. Robinson<sup>1</sup>, Jon Egaña<sup>2</sup>, Juan Medizabal-Zubiaga<sup>2</sup>, Allison C. Werner<sup>1</sup>, Pedro  
6     Grandes<sup>2</sup>, G. Campbell Teskey<sup>1</sup>, Matthew N. Hill<sup>1</sup> and Roger J. Thompson<sup>1</sup>

7  
8  
9  
10                     <sup>1</sup>Hotchkiss Brain Institute  
11                     Department of Cell Biology and Anatomy  
12                     University of Calgary  
13                     Calgary, AB, Canada

14  
15                     <sup>2</sup> Achucarro Basque Center for Neuroscience  
16                     Science Park of the UPV/EHU  
17                     and Department of Neurosciences  
18                     University of the Basque Country UPV/EHU  
19                     E-48940 Leioa, Spain

20  
21  
22                     Address correspondence to either:

23                     Roger J. Thompson  
24                     rj.thompson@ucalgary.ca  
25                     403-210-6312

26  
27                     Matthew N. Hill  
28                     mnhill@ucalgary.ca  
29

30

31

32

33

34

35

36

37

38

39 **Abstract**

40 Prolonged neurotransmitter release following synaptic stimulation extends the  
41 time window for postsynaptic neurons to respond to presynaptic activity. This can  
42 enhance excitability and increase synchrony of outputs, but the prevalence of this at  
43 normally highly synchronous synapses is unclear. We show that the postsynaptic  
44 channel, pannexin-1 (Pax1) regulates prolonged glutamate release onto CA1 neurons.  
45 Block of postsynaptic (CA1 neuronal) Pax1 increased the frequency of glutamate  
46 neurotransmission and action potentials in these neurons following Schaffer collateral  
47 stimulation. When Pax1 was blocked, anandamide levels increase and activated  
48 transient receptor potential vanilloid 1 (TRPV1)-mediated glutamate release. This  
49 TRPV1-induced synaptic activity enhanced excitability and translated into a faster rate of  
50 TRPV1-dependent epileptogenesis induced by kindling. We conclude that Pax1  
51 facilitates AEA clearance to maintain synchronous release onto CA1 neurons so that when  
52 AEA clearance is reduced, TRPV1 channels prolong glutamate neurotransmission to  
53 enhance network output to promote epileptiform activity.

54

55

56

57

58

59

60

61

62

63 Fast synaptic transmission, in contrast to stimulation-independent ongoing  
64 spontaneous transmission, is characterized by the highly synchronous release of  
65 neurotransmitter in response to presynaptic activation <sup>1</sup>. Asynchronous  
66 neurotransmitter release while less well understood, is typically stimulation-dependent  
67 and lasts hundreds of milliseconds. At excitatory synapses, asynchronous glutamate  
68 release can elevate firing rates in response to presynaptic stimulation <sup>2,3</sup>, enhancing  
69 coincidence detection <sup>4</sup>, and possibly promote spread of neurotransmitter <sup>1</sup>. Aberrant  
70 asynchronous release may influence neurodegeneration <sup>5</sup> or promote epileptogenesis <sup>6,7</sup>.  
71 At GABAergic synapses asynchronous release is likely involved in periods of prolonged  
72 inhibition <sup>8-10</sup>. All synapses show spontaneous release and most are specialized for either  
73 synchronous or asynchronous release, although some switch from being predominantly  
74 asynchronous to synchronous during development <sup>1,4,11</sup>. The demonstration that a  
75 typically synchronous synapse can switch between predominant modes of release would  
76 greatly expand their signalling capacity during physiology and pathology.

77 Asynchronous release typically involves a presynaptic Ca<sup>2+</sup> permeable channel that  
78 is likely distal from the release machinery, resulting in more prolonged intracellular Ca<sup>2+</sup>  
79 rises compared with voltage dependent Ca<sup>2+</sup> channel activity and synchronous release <sup>1,11</sup>.  
80 A common thread for these presynaptic Ca<sup>2+</sup> sources is that they are regulated by  
81 extracellular ligands, such as ATP activation of P2X2 at CA1-interneuron synapses <sup>12</sup> and  
82 endovanilloids for TRPV1 afferents of the nucleus tractus solitarius (NTS) <sup>13,14</sup>. The  
83 prevailing view is that these messengers function as either anterograde (presynaptic  
84 source), retrograde (postsynaptic source), or glial sources and it follows that the  
85 endocannabinoids/endovanilloids must be removed rapidly from the synapse for signal  
86 termination.

87 Pannexin-1 (Panx1) are ion / metabolite channels with well characterized  
88 pathological roles that include neuronal death during ischemia <sup>15-18</sup> and inflammation <sup>19</sup>.  
89 Panx1 expression is reported in the postsynaptic density (PSD) of hippocampal and  
90 cortical pyramidal neurons <sup>20</sup>, but the breadth of roles of these channels remain poorly  
91 understood. Panx1 enhances high frequency stimulation induced long-term potentiation  
92 (LTP) in the hippocampus <sup>21</sup> and attenuates low frequency induced long-term depression  
93 (LTD) <sup>22</sup>. Panx1 contributes to aberrant excitability by increasing the amplitude and  
94 frequency of interictal bursts <sup>23,24</sup>. Several acute, chemically induced seizure models have  
95 provided conflicting results on the ability of Panx1 to promote or inhibit ictal events <sup>25-27</sup>.  
96 Single, acute chemically-induced seizures (i.e. via pilocarpine or kainic acid) provide  
97 information on the short-term role of Panx1. These models however provide little  
98 mechanistic insight into the progressive increase in seizure severity seen during  
99 epileptogenesis, which may involve asynchronous neurotransmitter release <sup>6,7,28</sup>.

100 Here we report that block of postsynaptic Panx1 paired with Schaffer collateral  
101 simulation prolongs glutamate neurotransmission onto CA1 neurons that depends upon  
102 activation of presynaptic TRPV1 channels by the signalling lipid, anandamide (AEA).  
103 Panx1 regulates tissue levels of AEA by facilitating its clearance. Prolonged release  
104 increased tissue excitability and was critical for epileptogenesis during electrical kindling.  
105 Thus, we have found a novel form of short-term plasticity requiring postsynaptic Panx1  
106 and presynaptic TRPV1 that shifts the normally highly synchronous glutamate release  
107 onto CA1 neurons into a prolonged mode and promotes pathological network synchrony.

108

109

110

## 111 **Results**

### 112 **Block of postsynaptic Panx1 causes prolonged evoked glutamate release**

113 Panx1 is expressed in the postsynaptic density<sup>20</sup> and may therefore regulate  
114 synaptic activity. We selectively inhibited Panx1 in single postsynaptic CA1 neurons by  
115 inclusion of a blocking antibody,  $\alpha$ Panx1 (0.25 ng/ $\mu$ l) in the patch pipette<sup>17,18</sup>. The control  
116 was a polyclonal antibody against connexin-43 ( $\alpha$ Cx43), which is not expressed in these  
117 cells, but like Panx1 is a member of the gap junction family<sup>18</sup>. Postsynaptic block of Panx1  
118 did not change basal synaptic activity because the frequency and amplitude of  
119 spontaneous excitatory postsynaptic currents (sEPSC) were unaltered (Fig. 1ab). Schaffer  
120 collateral stimulation (paired-pulse stimulations at 0.33 Hz, 1 ms duration, 50ms  
121 interstim interval) induced a surprising increase in the frequency, but not the amplitude  
122 of sEPSCs, suggesting a presynaptic origin (Fig 1ab; note that shaded regions in b  
123 represent the stim population; longer exemplar recordings are shown in Fig. S1). These  
124 prolonged synaptic events occurred in all CA1 neurons tested (n=28). Interestingly, the  
125 prolonged synaptic events did not occur after every stimulation but were seen 22%  
126 (89/420) of the time and lasted for  $13 \pm 0.5$  s once initiated. Substituting  $\alpha$ Panx1 for  
127  $\alpha$ Cx43 (0.3ng/ $\mu$ l) did not induce prolonged release upon Schaffer collateral stimulation  
128 (Fig. 1b).

129 Responses to postsynaptic delivery of  $\alpha$ Panx1 were evaluated in our pyramidal  
130 neuron specific, conditional Panx1 knockout mice (Panx1<sup>-/-</sup>)<sup>18</sup>. The control animals  
131 received vehicle alone (5% ethanol/95%corn oil) and showed Schaffer collateral  
132 stimulation-dependent prolonged synaptic events when  $\alpha$ Panx1 was in the pipette (Fig.  
133 1c). Prolonged release did not occur in Panx1<sup>-/-</sup> neurons (tamoxifen treated Panx1<sup>fl/fl</sup>-  
134 *wfs1*-Cre mice) when  $\alpha$ Panx1 was in the pipette (Fig 1c). The lack of an effect of  $\alpha$ Panx1

135 in  $Panx1^{-/-}$  mice demonstrates specificity of the antibody<sup>17</sup> and specificity of the  
136 stimulation-induced prolonged release for postsynaptic Panx1.

137 We further examined the specificity of this novel synaptic activity on Panx1 with a  
138 peptidergic blocker, <sup>10</sup>panx (100  $\mu$ M) and its scrambled peptide control (sc<sup>10</sup>panx; 100  
139  $\mu$ M)<sup>24</sup>. Bath applied <sup>10</sup>panx paired with afferent stimulations resulted in a similar  
140 prolonged synaptic activity to  $\alpha$ Panx1 (n=6 neurons, duration =  $9.9 \pm 1.5$  s), but sc<sup>10</sup>panx  
141 did not (Fig. 1b). Thus, three distinct ways of eliminating Panx1 activity in either single  
142 postsynaptic CA1 neurons ( $\alpha$ Panx1) or *en masse* in the slice (<sup>10</sup>panx or  $Panx1^{-/-}$ ) resulted  
143 in prolonged glutamate release when Schaffer collaterals were stimulated.

144 Different inter-stimulation intervals were delivered to generate a stimulation-  
145 response curve (Fig. 1d). Significant (paired t-test;  $p < 0.05$ ) augmented release was  
146 observed with intervals of 10 and 20 s (0.17 and 0.33 Hz, respectively), but not at longer  
147 or shorter intervals (Fig. 1d). While 20s between afferent stimulations appeared optimal,  
148 both single (one pulse) and minimal (one pulse with a 50% failure rate) stimulations  
149 were also effective (Fig. S2a). Finally, the  $\alpha$ Panx1 had to be delivered intracellularly to be  
150 effective (Fig. S2b).

### 151 **Block of postsynaptic Panx1 increases action potential frequency following** 152 **stimulation**

153 We predicted that this prolonged glutamate release would increase neuronal  
154 excitability<sup>29</sup>. To test this, we recorded action potentials in CA1 neurons in response to  
155 afferent stimulation when  $\alpha$ Panx1 was in the pipette. Figure 1f shows 10 s recordings of  
156 action potentials from CA1 neurons in current clamp, with  $E_m$  held at -54 mV, which is  
157 below the average threshold (-47 mV) for these cells<sup>30</sup>. Without Schaffer collateral  
158 stimulation, inclusion of  $\alpha$ Panx1 in the pipette did not significantly change action

159 potential frequency (n=10, paired t-test, p=0.77). When postsynaptic  $\alpha$ Panx1 was  
160 combined with paired-pulse stimulation, as in the synaptic recordings presented above,  
161 increased action potential frequency occurred (Fig. 1fg). There was a substantial increase  
162 in the cumulative number of action potentials generated over a 10-minute stimulation  
163 period (Fig. 1f). Thus, the data in Figure 1 show that block of postsynaptic Panx1  
164 augments excitability following afferent stimulation via asynchronous glutamate release.

### 165 **TRPV1 is required for prolonged release and augmented excitability**

166 The stimulation induced asynchronous release during Panx1 block reminded us of  
167 transient receptor potential vanilloid 1 (TRPV1) channels in the NTS, where their  
168 activation by anandamide (AEA) causes asynchronous glutamate release<sup>13,31</sup>, even  
169 though our effect was substantially longer. We hypothesized that TRPV1 channels could  
170 account for the prolonged release observed when Panx1 is blocked. The expression of  
171 TRPV1 in the hippocampus is controversial and several groups either support<sup>32,33</sup> or  
172 refute<sup>34</sup> its presence. Therefore, we used immunoelectron microscopy in wildtype and  
173 TRPV1 knockout (TRPV1<sup>-/-</sup>) mice to investigate if TRPV1 is expressed at synapses in the  
174 CA1. We found that ~20% of terminals were TRPV1 positive, and immunogold labelling  
175 was almost undetectable in the TRPV1<sup>-/-</sup> mice (Fig 2ab).

176 If activation of TRPV1 is responsible for prolonged glutamate release during  
177 intracellular delivery of  $\alpha$ Panx1 to postsynaptic CA1 neuron then blocking or knockout of  
178 TRPV1 should abolish prolonged release. Addition of 10  $\mu$ M capsaizepine (CPZ) to the  
179 bath, while blocking postsynaptic Panx1, prevented afferent stimulation-induced  
180 asynchronous release (Fig 2cd) and increased action potential frequency (Fig. 2ef). CPZ is  
181 reported to alter activity of Ih in pyramidal neurons<sup>35</sup> so we evaluated the specific Ih  
182 blocker, ZD7288 (10  $\mu$ M), which failed to prevent prolonged release (Fig 2d). CPZ did not

183 affect the basal rate of spontaneous events in TRPV1<sup>-/-</sup> mice compared to wild type  
184 animals (wildtype frequency was 2.9±0.5 Hz versus 3.9±0.7 Hz in TRPV1<sup>-/-</sup> slices; p=0.45,  
185 Mann Whitney U test, n=7 and 7, respectively).

186 We inhibited fatty acid amid hydrolase (FAAH) by addition of 1 μM URB597 to the  
187 bath, which increases AEA concentration and reproduced the stimulation-dependent  
188 increase in neurotransmission (Fig. 2d), suggesting a key role for AEA. TRPV1<sup>-/-</sup> mice did  
189 not show an effect of postsynaptic αPax1 during afferent stimulation, but wild type mice  
190 had robust stimulation-induced prolonged release (Fig. 2g). Finally, bath application of  
191 capsaicin (CAP; 1 μM) to slices did not alter spontaneous release when compared to  
192 controls, but interestingly, with concomitant Schaffer collateral stimulation in the  
193 presence of CAP there was increased EPSP frequency. (Control mean frequency = 3.6±0.4  
194 Hz (n=7), with CAP = 3.7±0.6 Hz (n=3), which were not significant (p>0.05) from each  
195 other. Frequency with CAP+stimulation = 7.1±0.6 Hz (n=13), which was significantly  
196 increased versus CAP without stimulation at p>0.05; Kruskal-Wallis test , p=0.0009,  
197 H=18.81). This suggests that stimulation may induce insertion of TRPV1 into the plasma  
198 membrane, which may be regulated by phosphorylation of the channel <sup>36</sup>. Together, these  
199 data suggest that TRPV1 in the hippocampus may be responsible for prolonging  
200 glutamate release when Pax1 is blocked.

### 201 **Pax1 regulates tissue AEA levels**

202 How is TRPV1 activated when postsynaptic Pax1 is blocked? Since AEA is an  
203 endogenous ligand of TRPV1, and AEA has an important role in asynchronous release in  
204 the NTS <sup>13</sup>, we reasoned that Pax1 could be regulating its synaptic concentration. Tissue  
205 concentrations of AEA were quantified using mass spectrometry (Fig. 3a). Basal levels  
206 were 7.3±0.8 pg/mg (n=14 hippocampal slices from 6 rats). This significantly increased



207 to  $11.9 \pm 1.2$  pg/mg when Panx1 was blocked with  $^{10}\text{panx}$  ( $p=0.002$  vs control; one-way  
208 ANOVA,  $n=13$  slices from 6 rats). It was reported previously that TRPV1 may regulate  
209 AEA transport<sup>37</sup>. However, CPZ ( $10 \mu\text{M}$ ) did not change tissue AEA levels (with CPZ, AEA  
210 =  $7.4 \pm 0.7$  pg/mg;  $n=8$  slices from 4 rats;  $p>0.05$ , one-way ANOVA). These data support  
211 the idea that Panx1 block increases total AEA concentration in hippocampal slices.

## 212 **Ectopic expression of Panx1 in HEK293T cells augments fluorescent AEA uptake**

213 One possible mechanism for Panx1 block to increase tissue AEA concentration is  
214 by Panx1 facilitating clearance (uptake) of AEA. If true, ectopic expression of Panx1  
215 should augment the uptake of the AEA analogue, CAY10455, which fluoresces only after  
216 esterase cleavage in the cytosol. This assay was chosen over the [ $^3\text{H}$ ]AEA transport assay  
217 because radiolabelled AEA measurements do not distinguish between uptake and  
218 membrane accumulation. Transient transfection of Panx1 in HEK293T cells increased  
219 uptake of bath applied CAY10455 compared to mock transfected controls ( $5 \mu\text{M}$ ; Fig 3b).  
220 This uptake was blocked by  $^{10}\text{panx}$ , but not  $\text{sc}^{10}\text{panx}$  (Fig 3c). Importantly, a 10-fold  
221 excess of unmodified AEA ( $50 \mu\text{M}$ ) prevented CAY10455 influx into Panx1 expressing  
222 HEK293T cells (Fig 3c). While  $50 \mu\text{M}$  is a high concentration of AEA it was required to  
223 quantify block of CAY10455 fluorescence because lower concentrations of CAY10455  
224 were dim. Thus, our data presented in Fig 3 support a model whereby extracellular AEA  
225 clearance is facilitated by Panx1 channels.

## 226 **AEA blocks dye flux through Panx1**

227 How could Panx1 facilitate AEA uptake? One possibility is that these non-selective  
228 ion / metabolite channels are permeable to AEA and therefore are functioning as a  
229 synaptic AEA transporter. AEA is an uncharged molecule, making it impossible to  
230 measure flux (as current) with electrophysiology. However, Panx1 channels flux

231 molecules < 1kD, so we reasoned if the 0.35 kD AEA is permeable it should compete with  
232 dye flux through the channel and this would be a sensitive assay for AEA influx. We  
233 modified the cell-attached patch clamp to include the Panx1 permeable dye,  
234 sulforhodamine 101 (SR101; 0.6kD) and the Panx1 impermeable dye, FITC-dextran (3-  
235 5kD) in the pipette <sup>24</sup>. Voltage-dependent activation of Panx1 <sup>38</sup> in cultured hippocampal  
236 neurons induced single channel currents and SR101 uptake (Figs 4acd). FITC-dextran  
237 uptake occurred only in the whole-cell configuration (Fig 4b), indicating its occlusion is a  
238 control for membrane integrity in the cell-attached mode. The Panx1 blocker, <sup>10</sup>panx  
239 (100 $\mu$ M) in the pipette prevented SR101 influx and ionic currents (Fig. 4cd). Similarly,  
240 50 $\mu$ M AEA in the pipette reduced SR101 influx (Fig 4cd).

#### 241 **Constitutively active Panx1 facilitates AEA flux**

242 Panx1 may act to facilitate AEA flux by being constitutively active or through  
243 recruitment during synaptic activity or both. If there is basal Panx1 activity, we predicted  
244 that AEA loaded into CA1 neurons in slices via the patch-pipette could efflux the cell and  
245 activate presynaptic TRPV1 without stimulation. This would therefore show that AEA can  
246 have bidirectional flux and is consistent with models of AEA transport <sup>39</sup>. CA1 pyramidal  
247 neurons were loaded with 50  $\mu$ M AEA via the patch pipette and spontaneous excitatory  
248 synaptic currents (sEPSC) were recorded. Postsynaptic AEA increased sEPSC frequency  
249 without the requirement for afferent stimulation (Figs. 5abef). The increase in sEPSC  
250 frequency occurred  $3.6 \pm 1.1$  min after whole-cell formation in 8 of 10 cells tested, with a  
251 range of 19 s - 9 min. As shown in Fig. 5, the stimulation independent increase in sEPSC  
252 frequency with postsynaptic loading of AEA was blocked by either  $\alpha$ Panx1 in the pipette  
253 (Fig. 5c) or CPZ in the bath (Fig 5d). When Panx1 was blocked with  $\alpha$ Panx1 in the  
254 presence of postsynaptic AEA, afferent stimulation induced prolonged synaptic events

255 (Fig. 5f) similar to those in Fig. 1, indicating that afferent stimulation induced AEA was not  
256 likely normally coming from postsynaptic CA1 neurons via Panx1 despite the ability of  
257 Panx1 to efflux AEA when neurons were loaded with AEA.

### 258 **Asynchronous release does not involve postsynaptic Ca<sup>2+</sup>**

259 The requirement for afferent stimulation during application of postsynaptic  
260  $\alpha$ Panx1 suggests that AEA production may occur in a Ca<sup>2+</sup>-dependent way <sup>40</sup>, as is the case  
261 for most known retrograde signals <sup>41</sup>. These typically regulate synchronous  
262 neurotransmitter release by altering the coupling of voltage-gated Ca<sup>2+</sup> channels to  
263 release machinery <sup>41</sup>. This is unlikely in the present study because with postsynaptic  
264  $\alpha$ Panx1 the paired-pulse ratio (PPR) was unchanged (Fig. S3). We argue, based on Fig 5,  
265 against a postsynaptic source of AEA because prolonged release occurred when AEA was  
266 loaded into the postsynaptic neuron and Panx1 was blocked. However, if AEA is being  
267 produced in the CA1 neuron, it would likely require increased postsynaptic Ca<sup>2+</sup> for  
268 production <sup>40</sup>. When 10 mM BAPTA and  $\alpha$ Panx1 were added to the pipette to chelate  
269 postsynaptic Ca<sup>2+</sup>, prolonged glutamate release upon Schaffer collateral stimulation was  
270 still evident (Fig. 6ac). In contrast, incubation of hippocampal slices in membrane  
271 permeable EGTA-AM to chelate Ca<sup>2+</sup> in all cells (50 $\mu$ M; minimum 15 min loading time)  
272 blocked stimulation-induced prolonged release (Fig 6ac). We chose EGTA-AM over  
273 BAPTA-AM for bulk loading because EGTA does not block synchronous release, but is  
274 sufficient to inhibit the slower increases in Ca<sup>2+</sup> required for asynchronous release <sup>42</sup>.  
275 AEA can activate cannabinoid receptors (i.e. CB1). Therefore, we used the CB1 receptor  
276 inverse agonist, AM251 (3  $\mu$ M) and ruled out roles for these pathways in Panx1  
277 modulated prolonged release (Fig. 6bd). As a positive control for AM251, we isolated  
278 inhibitory postsynaptic GABA currents (IPSC) by removing picrotoxin and addition DNQX

279 to block AMPA receptors while adding  $\alpha$ Panx1 to the CA1 neuron via the patch pipette. As  
280 shown in Fig S4, there was a progressive inhibition of IPSCs that was reversed by AM251,  
281 indicating that blocking Panx1 can activate CB1 receptors at GABA synapses onto CA1  
282 neurons and suppress inhibition.

### 283 **Panx1 knockout augments electrical kindling in a TRPV1 dependent manner**

284 The prolonged glutamate release and suppression of GABA synapses described  
285 above should contribute to enhanced excitability *in vivo*. We investigated a potential role  
286 for Panx1 and TRPV1 in epileptogenesis using the electrical kindling model (Fig 7a).  
287 Electrical kindling stimulation of the dorsal hippocampus via chronically implanted  
288 bipolar electrodes induced seizures, which we quantified with electrographic recordings  
289 (i.e. Fig 7b) and by assignment of seizure severity on the Racine scale<sup>43</sup> for each session.  
290 Panx1<sup>-/-</sup> mice required fewer kindling sessions to become fully kindled (i.e. 3 stage 5  
291 seizures) (Fig. 7c) compared to untreated wild type mice and wild type mice that received  
292 tamoxifen (WT n=5; WT<sup>Tam</sup> n=5; Panx1<sup>-/-Tam</sup> n=6; one-way ANOVA [WT<sup>Tam</sup> vs Panx1<sup>-/-Tam</sup>  
293 p=0.0091]). Consistent with fewer sessions to reach 3 stage 5 seizures, Panx1<sup>-/-</sup> mice  
294 kindled more quickly than both control groups (Fig. 7d).

295 If this enhanced epileptogenesis in Panx1<sup>-/-</sup> was due to increased TRPV1  
296 activation, as the *in vitro* data indicate, then intraperitoneal (i.p.) injection of CPZ prior to  
297 each kindling session should return the kindling rate to the control level. 30 minutes  
298 prior to each kindling session, Panx1<sup>-/-</sup> mice received an i.p. injection of 5mg/kg CPZ. In  
299 the presence of CPZ, the kindling rate was not different from the control (Fig. 7cd; CPZ  
300 n=7; one-way ANOVA [control vs. CPZ p=0.4878]; [Panx1<sup>-/-Tam</sup> vs. CPZ p=0.0104]).

301

302

## 303 **Discussion**

304 Here we report a novel form of prolonged synaptic glutamate release onto CA1  
305 neurons that is dependent upon postsynaptic Panx1, presynaptic TRPV1, AEA and  
306 afferent stimulation. Several Panx1 blockers, including a validated blocking antibody  
307 directly delivered to single postsynaptic neurons, and conditional genetic deletion of  
308 Panx1 caused prolonged (seconds) glutamate release in response to Schaffer collateral  
309 stimulation. There was a parallel robust increase in action potential generation. We  
310 propose that postsynaptic Panx1 channels facilitate rapid clearance of afferent  
311 stimulation-produced AEA so that when the channels are closed, AEA accumulates and  
312 acts at TRPV1 to induce glutamate release (see Fig. S5). As a consequence of increased  
313 glutamate there was enhanced network synchrony seen as faster epileptogenesis during  
314 kindling. Importantly, augmented epileptogenesis was reversed by *in vivo* administration  
315 the TRPV1 antagonist, CPZ.

## 316 **TRPV1 and prolonged glutamate release**

317 In the hippocampus, short-term alterations of synaptic function are most often  
318 seen at inhibitory synapses and manifest as prolonged periods of transmitter release  
319 following stimulation<sup>44</sup>. An interesting example is the activation of P2X2 receptors at  
320 CA1-interneuron synapses, leading to asynchronous glutamate release<sup>12</sup>. While it has  
321 been controversial whether TRPV1 is broadly expressed in the hippocampus, it has been  
322 described in specialized Cajal-Retzius cells<sup>34</sup>. Furthermore, there are several functional  
323 demonstrations of TRPV1 activity in the brain. In hippocampal mossy fibres TRPV1 can  
324 induce a postsynaptic Ca<sup>2+</sup>-dependent LTD of both GABAergic and glutamatergic  
325 signalling via receptor internalization<sup>45,33</sup>. In addition, we show here that Panx1 block  
326 can activate CB1 receptors on GABAergic neurons to suppress IPSCs, which would be

327 expected to contribute to the overall excitation of the system. It is not clear if this was  
328 AEA-dependent and future studies will explore this possibility.

329 We have discovered that TRPV1 can induce prolonged glutamate release through a  
330 postsynaptic Ca<sup>2+</sup>-independent mechanism because high concentrations of BAPTA in the  
331 pipette failed to prevent prolonged release. It is possible that AEA spillover from adjacent  
332 neurons lead to prolonged glutamate release during postsynaptic BAPTA loading. We do  
333 not however favour this possibility because open Panx1 channels in these adjacent cells  
334 likely rapidly clear AEA. The simplest explanation for our data is that TRPV1 is expressed  
335 in presynaptic compartments that synapse with CA1 neurons and that TRPV1 is activated  
336 by Ca<sup>2+</sup>-dependent production of the endovanilloid, AEA. TRPV1 could be present in CA3  
337 axons<sup>46</sup>, or intriguingly, in Cajal-Retzius cells<sup>34</sup>. We report TRPV1 immunogold labelling  
338 in ~20% of presynaptic compartments in the CA1 region, which was absent in TRPV1<sup>-/-</sup>  
339 mice. However, we cannot determine if TRPV1 is in CA3 terminals or novel synapses from  
340 Cajal-Retzius cells. It is important to note that other, unidentified compartments were  
341 also labelled for TRPV1 in our immunohistochemical electron microscopy; the function of  
342 TRPV1 in these areas is not known.

### 343 **Panx1 regulates AEA concentration and TRPV1 activation**

344 AEA is a well-characterized ligand for TRPV1<sup>47</sup> with reported EC50 values  
345 between 0.7 - 5 μM in expression systems and ~10 μM in DRG neurons<sup>48</sup>. Thus, AEA  
346 would need to reach μM levels in synapses to effectively activate TRPV1. We show here  
347 that blocking Panx1 increased the concentration of AEA in hippocampal slices and  
348 propose that this increase in AEA is sufficient to activate TRPV1. Although reported bulk  
349 levels of AEA in brain are low (44 pmol/g)<sup>49</sup>, the requirement for Schaffer collateral  
350 stimulations to induce TRPV1-mediated prolonged release is consistent with the

351 concentration of AEA reaching transiently high levels. Excitatory neurons of the NTS  
352 release AEA to cause asynchronous glutamate release and enhanced excitation through  
353 recruitment of TRPV1<sup>13</sup>. In mossy fiber-CA3 synapses and DRG neurons the mechanism  
354 of TRPV1 activation by AEA is proposed to be intracellular (i.e. AEA is not released into  
355 extracellular space)<sup>45,50</sup>, which is distinct from what we are reporting here.

356         What is the source of AEA leading to prolonged glutamate release onto CA1  
357 neurons? The prevalent view is that AEA is a retrograde transmitter, synthesized in  
358 postsynaptic cells by Ca<sup>2+</sup>-dependent NAPE-PLD<sup>51</sup>. Our evidence supports the notion that  
359 AEA is produced in a stimulation / Ca<sup>2+</sup>-dependent way to act at postsynaptic sites in the  
360 CA1 region. It is unlikely that this AEA is synthesized in the postsynaptic neuron and is  
361 acting as a retrograde transmitter because postsynaptic Ca<sup>2+</sup> chelation failed to prevent  
362 asynchronous release when Panx1 was blocked. Additionally, we mimicked the  
363 stimulation evoked asynchronous release with bulk loading of AEA via the patch pipette,  
364 suggesting that Panx1 could facilitate release from the postsynaptic neuron. However,  
365 when this asynchronous release was prevented by blocking Panx1 it was evoked by  
366 Schaffer collateral stimulation. Together, this suggests that AEA biosynthesis is occurring  
367 in a different synaptic compartment than the CA1 neuron.

368         At excitatory CA3-CA1 synapses, the primary enzyme involved in AEA  
369 biosynthesis, NAPE-PLD, is reportedly expressed in presynaptic Schaffer collateral  
370 terminals<sup>52</sup>. The AEA degrading enzyme, FAAH, in contrast is expressed in postsynaptic  
371 CA1 neurons<sup>53</sup>. This molecular architecture is amenable to a stimulation and Ca<sup>2+</sup>-  
372 dependent mobilization of AEA from presynaptic terminals. It further implies that AEA  
373 should be transported into postsynaptic CA1 neurons for metabolism<sup>54</sup>. Schaffer  
374 collateral stimulation-induced AEA release is unlikely to be facilitated by (putative)

375 presynaptic Panx1 because bath applied blockers that act at extracellular sites on the  
376 channel mimicked the effect of intracellular application of postsynaptic blockers (i.e.  
377 increased asynchronous release). While the available data are most consistent with a  
378 presynaptic release of AEA, we cannot rule out other sources. There is emerging evidence  
379 that AEA can be synthesized and released from glial cells<sup>55,56</sup>. So an alternative  
380 mechanism could be that Schaffer collateral stimulation drives mobilization of AEA from  
381 local glial cells, and Panx1 then facilitates clearance.

382 It is unconventional for AEA to signal in this proposed way – to be released  
383 presynaptically and cleared postsynaptically while its site of action is on the cell that is  
384 releasing it. We propose that Panx1, TRPV1 and AEA regulate glutamate release when a  
385 modulation of neuronal synchrony is required. For example, asynchronous release may  
386 promote both low and high frequency outputs from the hippocampus<sup>57</sup>. Our  
387 identification of a role for Panx1 / TRPV1 during epileptogenesis (kindling) is likely a  
388 pathological manifestation of synchrony. It will be important in the future to determine if  
389 there are physiological roles for Panx1, AEA and TRPV1 in regulating hippocampal  
390 outputs during typical behaviour.

### 391 **Panx1 facilitates transport of AEA**

392 Panx1 could facilitate removal of AEA in two ways: Firstly, by acting as the direct  
393 route of AEA flux across the membrane, or secondly, by regulating an unidentified  
394 transporter or AEA binding protein. The biophysical nature of AEA transport across  
395 membranes has been investigated and Panx1's known properties are consistent with  
396 what we know about AEA transport<sup>58-60</sup>: Because Panx1 is a channel, it would have a low  
397 temperature dependence for flux, and the Q<sub>10</sub> for AEA transport is 1.4<sup>59,60</sup>. Panx1 is  
398 ubiquitously expressed and permeable to a broad range of ions and molecules. While it is



399 not yet known how the weakly polar / lipophilic AEA could traverse the channel, Panx1  
400 has hydrophobic amino acid residues in the pore <sup>61</sup> that could function as a scaffold for  
401 lipids to ‘jump’ independently of the water content. Alternatively, conformational changes  
402 or protonation / deprotonation of key pore lining amino acids could induce “dewetting” of  
403 the pore and a promote a hydrophobic environment. This ‘hydrophobic gating’ has been  
404 described in some bacterial ion channels <sup>62</sup>. A further possibility is that AEA moves  
405 between Panx1 channels. Members of the gap junction superfamily, like Panx1, tend to  
406 cluster together and there could be hydrophobic routes for AEA between the channels,  
407 however this latter possibility is not consistent with the competition of AEA and  
408 fluorescent SR101 in single channels. It also remains possible that Panx1 can regulate the  
409 concentrations of other synaptically active molecules, such as ATP or additional  
410 endocannabinoids.

411       Alternative to flux through Panx1, the channels may directly or indirectly regulate  
412 the activity of an unidentified AEA membrane transporter. For example, it has been  
413 proposed that fatty acid binding proteins shuttle AEA (and lipids) within the cell to sites  
414 of degradation <sup>63</sup>. Panx1 may localize closely with these proteins and facilitate binding of  
415 AEA. Another possibility is that Panx1 regulates FAAH activity, which has been reported  
416 to determine the concentration gradient for AEA influx <sup>64</sup> (see however <sup>65</sup>). Regardless,  
417 we have shown here that Panx1 activity regulates the AEA concentration, leading to  
418 TRPV1 activation, prolonged glutamate release following afferent stimulation and  
419 augmented excitability that can contribute to epileptogenesis.

420

421 **Acknowledgments**

422 The authors thank Dr. Keith Sharkey, Dr. Jaideep Bains, and Dr. Brian MacVicar for critical  
423 reading of the manuscript. The work was supported by grants from the Canadian  
424 Institutes of Health Research to MNH and RJT. Additional support was provided to RJT by  
425 the Cumming School of Medicine via the Ronald and Irene Ward Foundation and the  
426 Gwendolyn McLean Fund, and from the Hotchkiss Brain Institute. This work was  
427 supported by The Basque Government [grant number BCG IT764-13]; MINECO/FEDER,  
428 UE [grant number SAF2015-65034-R]; Red de Trastornos Adictivos UE/ERDF [grant  
429 numbers RD12/0028/0004 and RD16/0017/0012]; University of the Basque Country  
430 [UPV/EHU UFI11/41. NLW held an AI-HS scholarship and Dr. T. Chen Fong scholarship  
431 from the Hotchkiss Brain Institute. AWL holds post-doctoral fellowships from AIHS and  
432 CIHR. AVH holds Vanier-Canada, AI-HS and BONF studentships. MNH holds a Canada  
433 Research Chair Tier 2.

434

## 435 **References**

- 436 1. Kaeser, P. S. & Regehr, W. G. Molecular Mechanisms for Synchronous, Asynchronous,  
437 and Spontaneous Neurotransmitter Release. *Annu. Rev. Physiol.* **76**, 333–363 (2014).
- 438 2. Iremonger, K. J., Wamsteeker Cusulin, J. I. & Bains, J. S. Changing the tune: plasticity  
439 and adaptation of retrograde signals. *Trends Neurosci.* **36**, 471–479 (2013).
- 440 3. Rudolph, S., Overstreet-Wadiche, L. & Wadiche, J. I. Desynchronization of  
441 multivesicular release enhances Purkinje cell output. *Neuron* **70**, 991–1004 (2011).
- 442 4. Chuhma, N. & Ohmori, H. Postnatal development of phase-locked high-fidelity synaptic  
443 transmission in the medial nucleus of the trapezoid body of the rat. *J. Neurosci. Off. J.*  
444 *Soc. Neurosci.* **18**, 512–520 (1998).

- 445 5. Ruiz, R., Casañas, J. J., Torres-Benito, L., Cano, R. & Tabares, L. Altered intracellular  
446 Ca<sup>2+</sup> homeostasis in nerve terminals of severe spinal muscular atrophy mice. *J.*  
447 *Neurosci. Off. J. Soc. Neurosci.* **30**, 849–857 (2010).
- 448 6. Peter, C. Transition to seizure: marked increased afferent excitation and inhibition  
449 followed by abrupt cessation of inhibition. *Front. Neurosci.* **3**, (2009).
- 450 7. Jiang, M. *et al.* Enhancement of Asynchronous Release from Fast-Spiking Interneuron  
451 in Human and Rat Epileptic Neocortex. *PLoS Biol.* **10**, e1001324 (2012).
- 452 8. Lu, T. & Trussell, L. O. Inhibitory transmission mediated by asynchronous transmitter  
453 release. *Neuron* **26**, 683–694 (2000).
- 454 9. Hefft, S. & Jonas, P. Asynchronous GABA release generates long-lasting inhibition at a  
455 hippocampal interneuron-principal neuron synapse. *Nat. Neurosci.* **8**, 1319–1328  
456 (2005).
- 457 10. Best, A. R. & Regehr, W. G. Inhibitory regulation of electrically coupled neurons in the  
458 inferior olive is mediated by asynchronous release of GABA. *Neuron* **62**, 555–565  
459 (2009).
- 460 11. Fedchyshyn, M. J. & Wang, L.-Y. Developmental transformation of the release modality  
461 at the calyx of Held synapse. *J. Neurosci. Off. J. Soc. Neurosci.* **25**, 4131–4140 (2005).
- 462 12. Khakh, B. S. ATP-gated P2X receptors on excitatory nerve terminals onto interneurons  
463 initiate a form of asynchronous glutamate release. *Neuropharmacology* **56**, 216–222  
464 (2009).
- 465 13. Peters, J. H., McDougall, S. J., Fawley, J. A., Smith, S. M. & Andresen, M. C. Primary  
466 Afferent Activation of Thermosensitive TRPV1 Triggers Asynchronous Glutamate  
467 Release at Central Neurons. *Neuron* **65**, 657–669 (2010).

- 468 14. Fawley, J. A., Hofmann, M. E. & Andresen, M. C. Distinct Calcium Sources Support  
469 Multiple Modes of Synaptic Release from Cranial Sensory Afferents. *J. Neurosci. Off. J.*  
470 *Soc. Neurosci.* **36**, 8957–8966 (2016).
- 471 15. Bargiotas, P. *et al.* Pannexins in ischemia-induced neurodegeneration. *Proc Natl Acad*  
472 *Sci U A* **108**, 20772–7 (2011).
- 473 16. Thompson, R. J., Zhou, N. & MacVicar, B. A. Ischemia opens neuronal gap junction  
474 hemichannels. *Science* **312**, 924–7 (2006).
- 475 17. Weilinger, N. L. *et al.* Metabotropic NMDA receptor signaling couples Src family  
476 kinases to pannexin-1 during excitotoxicity. *Nat. Neurosci.* **19**, 432–442 (2016).
- 477 18. Weilinger, N. L., Tang, P. L. & Thompson, R. J. Anoxia-Induced NMDA Receptor  
478 Activation Opens Pannexin Channels via Src Family Kinases. *J. Neurosci.* **32**, 12579–  
479 12588 (2012).
- 480 19. Gulbransen, B. D. *et al.* Activation of neuronal P2X7 receptor-pannexin-1 mediates  
481 death of enteric neurons during colitis. *Nat Med* **18**, 600–4 (2012).
- 482 20. Zoidl, G. *et al.* Localization of the pannexin1 protein at postsynaptic sites in the  
483 cerebral cortex and hippocampus. *Neuroscience* **146**, 9–16 (2007).
- 484 21. Prochnow, N. *et al.* Pannexin1 stabilizes synaptic plasticity and is needed for learning.  
485 *PloS One* **7**, e51767 (2012).
- 486 22. Ardiles, A. O. *et al.* Pannexin 1 regulates bidirectional hippocampal synaptic plasticity  
487 in adult mice. *Front. Cell. Neurosci.* **8**, 326 (2014).
- 488 23. MacVicar, B. A. & Thompson, R. J. Non-junction functions of pannexin-1 channels.  
489 *Trends Neurosci* **33**, 93–102 (2010).
- 490 24. Thompson, R. J. *et al.* Activation of pannexin-1 hemichannels augments aberrant  
491 bursting in the hippocampus. *Science* **322**, 1555–9 (2008).

- 492 25. Kim, J.-E. & Kang, T.-C. The P2X7 receptor-pannexin-1 complex decreases muscarinic  
493 acetylcholine receptor-mediated seizure susceptibility in mice. *J. Clin. Invest.* **121**,  
494 2037–2047 (2011).
- 495 26. Santiago, M. F. *et al.* Targeting pannexin1 improves seizure outcome. *PLoS One* **6**,  
496 e25178 (2011).
- 497 27. Mylvaganam, S., Ramani, M., Krawczyk, M. & Carlen, P. L. Roles of gap junctions,  
498 connexins, and pannexins in epilepsy. *Front. Physiol.* **5**, 172 (2014).
- 499 28. Medrihan, L., Ferrea, E., Greco, B., Baldelli, P. & Benfenati, F. Asynchronous GABA  
500 Release Is a Key Determinant of Tonic Inhibition and Controls Neuronal Excitability: A  
501 Study in the Synapsin II <sup>-/-</sup> Mouse. *Cereb. Cortex* **25**, 3356–3368 (2015).
- 502 29. Iremonger, K. J. & Bains, J. S. Integration of asynchronously released quanta prolongs  
503 the postsynaptic spike window. *J Neurosci* **27**, 6684–91 (2007).
- 504 30. Staff, N. P., Jung, H. Y., Thiagarajan, T., Yao, M. & Spruston, N. Resting and active  
505 properties of pyramidal neurons in subiculum and CA1 of rat hippocampus. *J.*  
506 *Neurophysiol.* **84**, 2398–2408 (2000).
- 507 31. Smith, S. M. *et al.* Calcium regulation of spontaneous and asynchronous  
508 neurotransmitter release. *Cell Calcium* **52**, 226–233 (2012).
- 509 32. Puente, N. *et al.* The transient receptor potential vanilloid-1 is localized at excitatory  
510 synapses in the mouse dentate gyrus. *Brain Struct. Funct.* **220**, 1187–1194 (2015).
- 511 33. Chávez, A. E., Hernández, V. M., Rodenas-Ruano, A., Chan, C. S. & Castillo, P. E.  
512 Compartment-specific modulation of GABAergic synaptic transmission by TRPV1  
513 channels in the dentate gyrus. *J. Neurosci. Off. J. Soc. Neurosci.* **34**, 16621–16629  
514 (2014).

- 515 34. Cavanaugh, D. J. *et al.* Trpv1 reporter mice reveal highly restricted brain distribution  
516 and functional expression in arteriolar smooth muscle cells. *J. Neurosci. Off. J. Soc.*  
517 *Neurosci.* **31**, 5067–5077 (2011).
- 518 35. Ray, A. M. *et al.* Capsazepine Protects against Neuronal Injury Caused by Oxygen  
519 Glucose Deprivation by Inhibiting *I<sub>h</sub>*. *J. Neurosci.* **23**, 10146  
520 (2003).
- 521 36. Zhang, X., Huang, J. & McNaughton, P. A. NGF rapidly increases membrane expression  
522 of TRPV1 heat-gated ion channels. *EMBO J.* **24**, 4211–4223 (2005).
- 523 37. Hofmann, N. A. *et al.* TRPV1 mediates cellular uptake of anandamide and thus  
524 promotes endothelial cell proliferation and network-formation. *Biol. Open* **3**, 1164–  
525 1172 (2014).
- 526 38. Grundken, C. *et al.* Unified patch clamp protocol for the characterization of Pannexin 1  
527 channels in isolated cells and acute brain slices. *J Neurosci Methods* **199**, 15–25  
528 (2011).
- 529 39. Hillard, C. J. & Jarrahan, A. The movement of N-arachidonylethanolamine  
530 (anandamide) across cellular membranes. *Chem. Phys. Lipids* **108**, 123–134 (2000).
- 531 40. Cadas, H., Gaillet, S., Beltramo, M., Venance, L. & Piomelli, D. Biosynthesis of an  
532 endogenous cannabinoid precursor in neurons and its control by calcium and cAMP. *J.*  
533 *Neurosci. Off. J. Soc. Neurosci.* **16**, 3934–3942 (1996).
- 534 41. Regehr, W. G., Carey, M. R. & Best, A. R. Activity-Dependent Regulation of Synapses by  
535 Retrograde Messengers. *Neuron* **63**, 154–170 (2009).
- 536 42. Ohana, O. & Sakmann, B. Transmitter release modulation in nerve terminals of rat  
537 neocortical pyramidal cells by intracellular calcium buffers. *J. Physiol.* **513 ( Pt 1)**,  
538 135–148 (1998).

- 539 43. Racine, R. J. Modification of seizure activity by electrical stimulation. II. Motor seizure.  
540 *Electroencephalogr. Clin. Neurophysiol.* **32**, 281–294 (1972).
- 541 44. McBain, C. J. & Kauer, J. A. Presynaptic plasticity: targeted control of inhibitory  
542 networks. *Curr. Opin. Neurobiol.* **19**, 254–262 (2009).
- 543 45. Chávez, A. E., Chiu, C. Q. & Castillo, P. E. TRPV1 activation by endogenous anandamide  
544 triggers postsynaptic long-term depression in dentate gyrus. *Nat. Neurosci.* **13**, 1511–  
545 1518 (2010).
- 546 46. Hunt, D. L., Puente, N., Grandes, P. & Castillo, P. E. Bidirectional NMDA receptor  
547 plasticity controls CA3 output and heterosynaptic metaplasticity. *Nat. Neurosci.* **16**,  
548 1049–1059 (2013).
- 549 47. Zygmunt, P. M. *et al.* Vanilloid receptors on sensory nerves mediate the vasodilator  
550 action of anandamide. *Nature* **400**, 452–457 (1999).
- 551 48. Ross, R. A. Anandamide and vanilloid TRPV1 receptors. *Br. J. Pharmacol.* **140**, 790–801  
552 (2003).
- 553 49. Buczynski, M. W. & Parsons, L. H. Quantification of brain endocannabinoid levels:  
554 methods, interpretations and pitfalls: Quantification of brain eCBs. *Br. J. Pharmacol.*  
555 **160**, 423–442 (2010).
- 556 50. van der Stelt, M. *et al.* Anandamide acts as an intracellular messenger amplifying Ca<sup>2+</sup>  
557 influx via TRPV1 channels. *EMBO J.* **24**, 3026–3037 (2005).
- 558 51. Chevaleyre, V. & Castillo, P. E. Endocannabinoid-mediated metaplasticity in the  
559 hippocampus. *Neuron* **43**, 871–881 (2004).
- 560 52. Nyilas, R. *et al.* Enzymatic Machinery for Endocannabinoid Biosynthesis Associated  
561 with Calcium Stores in Glutamatergic Axon Terminals. *J. Neurosci.* **28**, 1058–1063  
562 (2008).

- 563 53. Cristino, L. *et al.* Immunohistochemical localization of anabolic and catabolic enzymes  
564 for anandamide and other putative endovanilloids in the hippocampus and cerebellar  
565 cortex of the mouse brain. *Neuroscience* **151**, 955–968 (2008).
- 566 54. Gulyas, A. I. *et al.* Segregation of two endocannabinoid-hydrolyzing enzymes into pre-  
567 and postsynaptic compartments in the rat hippocampus, cerebellum and amygdala.  
568 *Eur. J. Neurosci.* **20**, 441–458 (2004).
- 569 55. Gabrielli, M. *et al.* Active endocannabinoids are secreted on extracellular membrane  
570 vesicles. *EMBO Rep.* **16**, 213–220 (2015).
- 571 56. Stella, N. Cannabinoid and cannabinoid-like receptors in microglia, astrocytes, and  
572 astrocytomas. *Glia* **58**, 1017–1030 (2010).
- 573 57. Li, X. & Ascoli, G. A. Effects of Synaptic Synchrony on the Neuronal Input-Output  
574 Relationship. *Neural Comput.* **20**, 1717–1731 (2008).
- 575 58. Fowler, C. J. Transport of endocannabinoids across the plasma membrane and within  
576 the cell. *FEBS J.* **280**, 1895–1904 (2013).
- 577 59. Hillard, C. J., Edgemond, W. S., Jarrahian, A. & Campbell, W. B. Accumulation of N-  
578 arachidonylethanolamine (anandamide) into cerebellar granule cells occurs via  
579 facilitated diffusion. *J. Neurochem.* **69**, 631–638 (1997).
- 580 60. Hillard, C. J. & Jarrahian, A. Accumulation of anandamide: evidence for cellular  
581 diversity. *Neuropharmacology* **48**, 1072–1078 (2005).
- 582 61. Wang, J. & Dahl, G. SCAM analysis of Panx1 suggests a peculiar pore structure. *J. Gen.*  
583 *Physiol.* **136**, 515–527 (2010).
- 584 62. Aryal, P., Sansom, M. S. P. & Tucker, S. J. Hydrophobic gating in ion channels. *J. Mol.*  
585 *Biol.* **427**, 121–130 (2015).



- 586 63. Kaczocha, M., Glaser, S. T. & Deutsch, D. G. Identification of intracellular carriers for  
587 the endocannabinoid anandamide. *Proc. Natl. Acad. Sci. U. S. A.* **106**, 6375–6380  
588 (2009).
- 589 64. Kaczocha, M., Hermann, A., Glaser, S. T., Bojesen, I. N. & Deutsch, D. G. Anandamide  
590 uptake is consistent with rate-limited diffusion and is regulated by the degree of its  
591 hydrolysis by fatty acid amide hydrolase. *J. Biol. Chem.* **281**, 9066–9075 (2006).
- 592 65. Fegley, D. *et al.* Anandamide transport is independent of fatty-acid amide hydrolase  
593 activity and is blocked by the hydrolysis-resistant inhibitor AM1172. *Proc. Natl. Acad.*  
594 *Sci. U. S. A.* **101**, 8756–8761 (2004).
- 595 66. Birder, L. A. *et al.* Altered urinary bladder function in mice lacking the vanilloid  
596 receptor TRPV1. *Nat. Neurosci.* **5**, 856–860 (2002).
- 597 67. Qi, M., Morena, M., Vecchiarelli, H. A., Hill, M. N. & Schriemer, D. C. A robust capillary  
598 liquid chromatography/tandem mass spectrometry method for quantitation of  
599 neuromodulatory endocannabinoids. *Rapid Commun. Mass Spectrom. RCM* **29**, 1889–  
600 1897 (2015).

601

## 602 **Figure Legends**

603 **Fig 1. Block of postsynaptic pannexin-1 augments stimulation induced glutamate**  
604 **release and action potential frequency. a)** Exemplar sweeps from CA1 pyramidal  
605 neurons, voltage clamped at -70 mV under control conditions (top) and after paired pulse  
606 stimulation of Schaffer collaterals (arrow). The red traces are from a neuron with  
607 0.25ng/μl αPax1 (Pax1 blocking antibody) in the patch pipette, without (top red trace)  
608 and with synaptic stimulation (arrow). **b)** cumulative probability distributions of EPSP  
609 frequency (black lines are control and red lines are with postsynaptic αPax1. The plots

610 on the left show the paired distribution of EPSP amplitudes, which were not significantly  
611 different (Wilcoxon matched-pairs signed rank test, control (black)  $p=0.83$ , with  $\alpha$ Panx1  
612 (red)  $p=0.3$ ). **c)** Histogram showing the frequency of excitatory postsynaptic events  
613 before and after synaptic stimulation (shaded regions). Note the significant (Kruskal-  
614 Wallis test with Dunn's post hoc) increase in the frequency of events following  
615 stimulation, indicating prolonged release. Two blockers of Panx1,  $\alpha$ Panx1 (in the pipette,  
616  $p<0.0001$ ) and  $^{10}$ panx (100  $\mu$ M in the bath,  $p<0.0001$ ) caused prolonged release following  
617 stim. The control for  $\alpha$ Panx1 ( $\alpha$ Cx43,  $p=0.084$ ) and for  $^{10}$ panx ( $sc^{10}$ panx,  $p=0.074$ ) were  
618 not effective. **d)** The prolonged glutamate release induced by  $\alpha$ Panx1 was present in  
619 Panx1<sup>fl/fl</sup> mice treated with vehicle (left bars) but not in knockout mice (treated with  
620 tamoxifen; right bars). Kruskal-Wallis with Dunn's post hoc: vehicle control vs. vehicle  
621 stim,  $p<0.05$ ; vehicle control vs. tamoxifen control,  $p>0.05$ ; tamoxifen control vs.  
622 tamoxifen stim,  $p>0.05$ ). **e)** Delivery of paired pulse synaptic stimulations at the  
623 indicated time intervals reveals a stimulation-response curve for asynchronous release  
624 when  $\alpha$ Panx1 is in the pipette (red circles). **f)** Overlaid one-minute current clamp ( $V_m = -$   
625 54mV) recordings, showing spontaneous action potentials in control (black) and neurons  
626 with  $\alpha$ Panx1 in the pipette (red). Upper recordings did not receive synaptic stimulation.  
627 Lower recordings received paired pulse (20s intervals) at the arrow. Note that more  
628 action potentials are generated with  $\alpha$ Panx1 is in the pipette and Schaffer collaterals are  
629 stimulated. **g)** plot of the cumulative number of action potentials over a 20 minute  
630 period. Synaptic stimulation (vertical dashed lines) dramatically increases total number  
631 of action potentials when  $\alpha$ Panx1 is in the pipette. **h)** Comparison of the mean action  
632 potential frequency with the Kruskal-Wallis test with Dunn's post hoc on mean number of  
633 action potentials calculated for 5 minutes at the beginning and end of the recordings.

634 Control vs. control with stim,  $p=0.035$ ; control vs.  $\alpha$ Panx1 baselines,  $p=0.7$ ; control with  
635 stim vs  $\alpha$ Panx1 with stim,  $p=0.0048$ . \* $p < 0.05$  data is represented as mean $\pm$ SEM  
636  
637 **Fig. 2 TRPV1 is required for postsynaptic Panx1 block-induced prolonged**  
638 **neurotransmission and excitability.** **a)** Immunogold labelling of TRPV1 labelling in  
639 wildtype (top) and TRPV1<sup>-/-</sup> knockout (bottom) mice in area CA1. Arrows indicate TRPV1  
640 immunogold particles. Terminals are blue and CA1 spines or dendrites red. Scale bars  
641 represent 1  $\mu$ m. **b)** Comparison of the percentage of labelled terminals (each point is an  
642 individual animal) showed a significantly fewer number of TRPV1 positive terminals in  
643 the TRPV1<sup>-/-</sup> mice (Mann Whitney test,  $p=0.079$ ). **c)** The  $\alpha$ Panx1 and synaptic stimulation  
644 (arrow, paired pulse at 20s intervals) prolonged release was blocked by bath applied  
645 TRPV1 antagonist, capsazepine (CPZ; 10  $\mu$ M). **d)** Comparison of the sEPSC frequency with  
646 TRPV1 blocked (CPZ) or Ih blocked (ZD7288 (10  $\mu$ M)). Kruskal-Wallis with Dunn's post  
647 hoc:  $\alpha$ Panx1 baseline vs.  $\alpha$ Panx1 with stim,  $p=0.014$ ;  $\alpha$ Panx1 baseline vs.  $\alpha$ Panx1 + CPZ  
648 with stim,  $p>0.9$ ; ZD7288 baseline (open purple circles) vs. ZD7288 with stim (closed  
649 purple circles),  $p=0.01$ . Comparison of the FAAH inhibitor, URB597 showed a significant  
650 ( $p=0.01$ ; Wilcoxon paired) increase upon stimulation. **e)** Comparison of the changes in  
651 sEPSC frequency in wildtype (C57BL6/J) compared to TRPV1<sup>-/-</sup> mice. Kruskal-Wallis with  
652 Dunn's post hoc: wildtype baseline vs. wildtype with stim,  $p=0.024$ ; wildtype baseline vs.  
653 TRPV1<sup>-/-</sup> baseline,  $p=0.53$ ; TRPV1<sup>-/-</sup> baseline vs. TRPV1<sup>-/-</sup> with stim,  $p>0.9$ . **f)** Current  
654 clamp recordings of action potentials with  $\alpha$ Panx1 in the pipette (red) and CPZ in the bath  
655 (green). Synaptic stimulation (lower traces, arrow) increased action potential frequency  
656 and this was blocked by CPZ. **g)** Comparison of the action potential frequency with  
657 (shaded) and without synaptic stimulation in the presence of CPZ (bars; blue points)

658 showed no significant difference (Wilcoxon matched pairs,  $p=0.84$ ). The red circles show  
659 the change in frequency when CPZ was not in the pipette (data from Fig. 1e).  $*p = <0.05$   
660 data is represented as mean $\pm$ SEM

661

662 **Fig 3. Block of Panx1 increases tissue levels of anandamide and ectopic expression**

663 **promotes uptake of a fluorescent anandamide derivative. a)** The Panx1 blocker,

664  $^{10}\text{panx}$  was bath applied to acute hippocampal slices and AEA content quantified by mass

665 spectrometry. Panx1 block, but not TRPV1 block (with CPZ) increases the concentration

666 of AEA. Kruskal-Wallis with Dunn's post hoc: control vs.  $^{10}\text{panx}$ ,  $p<0.05$ ; control vs. CPZ,

667  $p>0.05$ . **b)** Panx1 expression in HEK293 cells augmented uptake of fluorescent

668 anandamide ( $5\mu\text{M}$  CAY10455) compared to mock transfected controls. The green box

669 indicates the presence of CAY10455 in the bath. CAY10455 uptake was inhibited by the

670 Panx1 antagonist,  $100\mu\text{M}$   $^{10}\text{panx}$  or unlabelled AEA ( $50\mu\text{M}$ ). Two-way ANOVA revealed

671 significantly ( $p<0.05$ ) different increases over time as indicated. **c)** Comparison of the

672 CAY10455 uptake as an average of the fluorescence between 15-20 min. The scrambled

673 control for  $^{10}\text{panx}$ ,  $\text{sc}^{10}\text{panx}$  did not prevent CAY10455 uptake. One-way Anova with

674 Tukey's multiple comparisons: mock transfected vs. Panx1 transfected  $p=0.005$ ; Panx1 vs

675  $^{10}\text{panx}$   $p=0.019$ ; Panx1 vs AEA  $p=0.007$ ; all other comparisons were not significant.  $*p =$

676  $<0.05$  data is represented as mean $\pm$ SEM.

677

678 **Fig. 4. Anandamide competes with dye uptake through pannexin-1 in neurons. a)**

679 Cultured hippocampal neurons were patch-clamped in the cell-attached mode with SR101

680 (red) and FITC-dextran 4kDa (green) in the pipette in addition to a cocktail of blockers for

681 other channels / receptors. Only Panx1 permeable SR101 enters neurons during voltage

682 ramp depolarizations. **b)** Break-in to whole-cell mode leads to rapid loading of all dyes. **c)**  
683 Superimposed current recordings and dye flux. The inset (grey trace) shows the typical  
684 fast gating of pannexin-1 single channels. SR101 influx occurred when channel activity  
685 was detectable in the patch. Note that the pannexin-1 impermeable FITC-dextran (green)  
686 did not enter neurons. With 100 $\mu$ M <sup>10</sup>panx (2<sup>nd</sup> trace) or 50 $\mu$ M AEA (3<sup>rd</sup> trace) in the  
687 pipette, SR101 influx was attenuated. The combined addition of AEA and <sup>10</sup>panx (bottom  
688 trace) also reduced SR101. **d)** Comparison of the rate of change in SR101 fluorescence in  
689 neurons (top) and the rate of SR101 influx normalized to total charge (Q) (bottom).  
690 Kruskal-Wallis test with Dunn's multiple comparisons: control vs AEA, p=0.035; control  
691 vs <sup>10</sup>panx p<0.0001; control vs <sup>10</sup>panx+AEA, p=0.006; all other comparisons p>0.05.

692

693 **Fig. 5. Loading of AEA in the postsynaptic neurons augments glutamate release in a**  
694 **Panx1 and TRPV1 dependent manner. a-d)** Recordings from 4 different CA1 neurons  
695 under the conditions indicated. Note that AEA in the pipette (b) increases sEPSC  
696 frequency with a delay after break-in. Either  $\alpha$ Panx1 in the pipette (c) or CPZ in the bath  
697 (d) block this increase. **e)** Cumulative probability plot of the instantaneous frequency of  
698 sEPSCs. Colors of the lines match the same conditions shown in f. **f)** Comparison of the  
699 mean $\pm$ SEM frequency of sEPSC events. Kurskal-Wallis test with Dunn's post hoc: control  
700 (black) vs. AEA (blue), p=0.017; control vs.  $\alpha$ Panx1 baseline (red open circles), p>0.9;  
701  $\alpha$ Panx1 baseline vs  $\alpha$ Panx1 with stimulation, p=0.006; control (black) vs AEA+CPZ  
702 (purple), p=0.515. \*denotes significantly different.

703

704 **Fig. 6. Prolonged neurotransmission does not require postsynaptic Ca<sup>2+</sup> or CB1**  
705 **receptors.** All recordings contained  $\alpha$ Panx1 in the pipette. **a)** Exemplar recordings from

706 2 different CA1 neurons under high postsynaptic Ca<sup>2+</sup> buffering conditions (top; BAPTA)  
707 and low Ca<sup>2+</sup> buffering conditions in all cells (blue; EGTA-AM). The slow Ca<sup>2+</sup> buffer  
708 prevented synaptic bursting in response to afferent stimulation (arrows), but strong  
709 buffering in the postsynaptic cell did not. **b)** Comparison of the frequency changes in  
710 glutamate neurotransmission with different Ca<sup>2+</sup> buffers. Wilcoxon matched pairs test:  
711 BAPTA baseline vs. BAPTA stimulated, p=0.031; EGTA control vs. EGTA stimulated, p=0.5.  
712 **c&d)** The classical retrograde transmitter receptor, CB1R was ruled out by application of  
713 its specific antagonist, AM251. Wilcoxon matched pairs test p=0.03. Bars show mean.  
714 \*Denotes significance at p>0.05.

715

716 **Fig. 7. Panx1 knockout augments epileptogenesis in a TRPV1-dependent manner.**

717 **a)** Electrical kindling paradigm. Mice received electrical kindling stimulation in the  
718 ventral hippocampus twice daily until fully kindled, indicated by 3 consecutive stage 5  
719 seizures. **b)** Example EEG recording showing the ictal event (afterdischarge). **c)** The  
720 number of kindling sessions required to reach 3 stage 5 seizures was significantly lower  
721 in Panx1<sup>-/-</sup> mice and this was reversed by i.p. injection of CPZ prior to each kindling  
722 session. One-way ANOVA with Tukey's post hoc: control (black) vs Panx1<sup>-/-</sup> p=0.012.  
723 Control vs. Panx1<sup>-/-</sup> + CPZ (purple) p>0.05. **d)** Comparison of the time course of kindling  
724 reveals that Panx1<sup>-/-</sup> mice reached stage 5 seizures sooner than the controls. This was  
725 reversed by CPZ.

726

727

728

729

## 730 **Materials and Methods**

731 *Animals:* All animal care protocols were approved by the University of Calgary's Animal  
732 Care and Use Committee in accordance with the Canadian Council on Animal Care  
733 guidelines. Experiments were performed on 21-37 day old male Sprague Dawley rats  
734 housed on a 12 hour light/dark cycle with access to Purina Laboratory Chow and water  
735 *ad libitum*. Wild type mice (C57BL/6J), conditional pannexin-1 knockout mice<sup>18</sup> and  
736 TRPV1 knockout mice<sup>66</sup> were housed under the same conditions. Panx1 knockout was  
737 achieved by tamoxifen delivered daily by peritoneal injections of 100mg/kg for 5 days<sup>18</sup>.  
738 Controls for the Panx1 knockouts were littermates that received vehicle alone (5%  
739 ethanol/95% corn oil) daily for 5 days. Animals were sacrificed at least 72 hours after  
740 final injections.

741 *Chemicals and reagents:* All salts used for the artificial cerebral spinal fluid (aCSF) were  
742 from Sigma-Aldrich. Capsazepine (10 $\mu$ M) and anandamide (50 $\mu$ M), were from Tocris  
743 Bioscience. Specific mimetic peptides of Panx1, <sup>10</sup>panx and a scrambled control peptide of  
744 <sup>10</sup>panx (sc<sup>10</sup>panx) were custom synthesized by AnaSpec or New England Peptide. The C-  
745 terminal anti-Panx1 (0.25ng/ $\mu$ l) was from Invitrogen (catalog #488100, rabbit  
746 polyclonal). Anti-connexin-43 (0.3ng/ $\mu$ l) was from Abcam (catalog #ab11370, rabbit  
747 polyclonal). All drugs were dissolved in water, DMSO or ethanol and aliquoted and frozen.  
748 Drugs were then dissolved in aCSF to their final working concentrations. Final  
749 concentrations of DMSO or ethanol did not exceed 0.1%.

750 *Acute hippocampal slice preparation:* Rats or mice were anesthetized by isoflurane  
751 inhalation in air and decapitated; the brain was extracted, blocked, mounted on a  
752 vibrating slicer (VT1200S; Leica) and submerged in an ice-cold high sucrose solution  
753 consisting of the following (in mM): 87NaCl, 2.5 KCl, 25 NaHCO<sub>3</sub>, 0.5 CaCl<sub>2</sub>, 7 MgCl<sub>2</sub>, 1.25

754 NaH<sub>2</sub>PO<sub>4</sub>, 25 glucose, and 75 sucrose, saturated with 95% O<sub>2</sub> /5% CO<sub>2</sub>. Transverse  
755 hippocampal slices were cut (370µm for rats and 300µm for mice) and placed into a  
756 chamber containing artificial cerebral spinal fluid at 33°C for at least 1 h before use. aCSF  
757 consisted of 120 mM NaCl, 26 mM NaHCO<sub>3</sub>, 3mM KCl, 1.25 mM NaH<sub>2</sub>PO<sub>4</sub>, 1.3 mM MgCl<sub>2</sub>,  
758 2mM CaCl<sub>2</sub>, and 10 mM glucose and was saturated with 95% O<sub>2</sub> /5% CO<sub>2</sub>.

759 *Primary hippocampal culture preparation:* Post natal day zero (P0) pups were used for  
760 primary hippocampal cultures as described previously<sup>17,18</sup>. Pups were anaesthetized on  
761 ice and decapitated. Hippocampi were carefully dissected and suspended in a growth  
762 media consisting of 1mM BME supplemented with sodium pyruvate, 50mg/mL penicillin,  
763 50units/mL streptomycin, B17 supplement (all from Invitrogen), 10mM HEPES (Sigma),  
764 0.3% glucose (Sigma), and 4% fetal bovine serum. Neural tissue was dissociated by  
765 triturating hippocampi in growth media containing papain (Worthington). The neuron /  
766 glia co-culture was then washed and plated with growth media on poly-D-lysine and  
767 laminin coated 12mm diameter glass coverslips (Thermo) at 7000-8800 cells/cm<sup>2</sup>.  
768 Cultures were grown in 24-well plates and maintained at 37°C in a humidified incubator  
769 (Thermo). Experiments were performed on neuronal cultures from 10 to 20 days after  
770 plating, and were equilibrated in aCSF (33°C, bubbled with 95% O<sub>2</sub> / 5% CO<sub>2</sub>) for at least  
771 30 minutes prior to experimentation.

772 *Electrophysiology:* Slices were transferred to a recording chamber and constantly  
773 perfused with aCSF (33°C-35°C) at a rate of 1-2mL/min. Visualization of hippocampal CA1  
774 pyramidal neurons was achieved with differential interference contrast (DIC) microscopy  
775 with an Olympus BX51Wi microscope. Whole cell voltage clamp recordings were  
776 performed using borosilicate glass microelectrodes (Sutter Instrument) with a tip  
777 resistance of 3-6MΩ which were pulled using a P-1000 Flaming/Brown Micropipette



778 Puller (Sutter Instrument). Microelectrodes were filled with an intracellular solution  
779 containing 108 mM potassium gluconate, 2 mM MgCl<sub>2</sub>, 8mM sodium gluconate, 8 mM KCl,  
780 2.5 mM K<sub>2</sub>-EGTA, 4 mM K<sub>2</sub>-ATP, and 0.3 mM Na<sub>3</sub>-GTP at pH 7.25 with 10 mM HEPES.  
781 Some experiments were performed with a Panx1 antibody (0.25ng/μl αPanx1) or 50μM  
782 anandamide in the pipette. When either of these were included in the intracellular  
783 solution the cell was given a minimum of 5 minutes for intracellular equilibration.  
784 Electrophysiological data were digitized at 10 kHz and low-pass filtered at 1 kHz with a  
785 MultiClamp 700B amplifier and Digidata 1440A analog to digital convertor (Molecular  
786 Devices). Data were recorded using pCLAMP 10, Clampex 10.3, and Axoscope 10.3  
787 (Molecular Devices) software and stored for future analysis with Clampfit 10.3, GraphPad  
788 Prism 6, and Excel (Microsoft).  
789 Whole-cell current clamp recordings were obtained from CA1 pyramidal neurons held  
790 just below spiking threshold (which is approximately -47mV for CA1 pyramidal neurons)  
791 by adjusting the holding potential of the neuron with current injections ranging from  
792 50pA – 120pA. Membrane potential was recorded for 10 minutes to obtain the baseline,  
793 followed by an additional 10 minutes with paired pulse stimulations (two 1ms  
794 stimulations delivered 50ms apart) delivered to the Schaffer collaterals at one-minute  
795 intervals. The frequency of action potentials was quantified with Clampfit 10.3. Data were  
796 plotted using Graphpad Prism 6.  
797 *AEA / SR101 transport competition*: Experiments measuring flux of AEA through Panx1  
798 were performed by combined patch-clamp electrophysiology and 2-photon laser  
799 stimulation microscopy (2PLSM). Cultured primary hippocampal neurons were patched  
800 in on-cell mode. The recording pipette and bath solutions consisted of aCSF containing a  
801 cocktail of ionotropic channel blockers to isolate Panx1 currents (1μM TTX, 50μM CdCl<sub>2</sub>,

802 10mM TEA, 1mM 4-AP, 10 $\mu$ M Nifedipine, 100 $\mu$ M picrotoxin, and 20 $\mu$ M MK-801 from  
803 Sigma) (18). The recording pipette also contained the Panx1-impermeable FITC-Dextran  
804 (50 $\mu$ M, 3,000-5,000 MW) and Panx1-permeable SR101 (100 $\mu$ M, 606.71 MW) fluorescent  
805 dyes, with some experiments including 50 $\mu$ M AEA and/or  $\alpha$ Panx1. FITC-D and SR101  
806 were excited with a coherent chameleon 2-photon laser tuned to 740nm. Emission signals  
807 were split through a beamsplitter (560nm) and red/green fluorescence was passed  
808 through bandpass filters (585/40 and 525/25 nm, respectively). 2PLSM imaging data  
809 were acquired with external photomultiplier tubes and processed with Leica Application  
810 Suite Advanced Fluorescence. Changes in fluorescence were calculated as  $\Delta F/F$  ( $F - F_0 / F_0$ ).  
811 If a steady, positive change in FITC-D fluorescence was detected (+5% above baseline for  
812 over 20 seconds), it was assumed that the membrane had partially ruptured and the  
813 recording was discarded. Images were acquired at 512x512 pixel density at 5s intervals  
814 with simultaneous voltage clamp recordings. On-cell patches were held at +60mV  
815 (equivalent to -60mV internal membrane potential) and a voltage ramp protocol  
816 (equivalent to -80mV to +80mV relative to the inside of the cell, 200ms) was used to  
817 activate Panx1. Charge per sweep was quantified using Clampfit 10.3? and was directly  
818 plotted against SR101 influx. The rate of change of fluorescence per unit charge over was  
819 calculated as slope, allowing us to normalize for a differential distribution of Panx1  
820 channels present in different experiments.

821 *Mass Spectrometrical Detection of Anandamide Levels:* Hippocampal slices underwent a  
822 lipid extraction process as previously described<sup>67</sup>. In brief, tissue samples were weighed  
823 and placed in borosilicate glass culture tubes containing 2 ml of acetonitrile with 5 pmol  
824 of [<sup>2</sup>H<sub>8</sub>] AEA for extraction. These samples were homogenized with a glass rod, sonicated  
825 for 30 min, incubated overnight at -20°C to precipitate proteins, then centrifuged at 1500

826 g for 5 min to remove particulates. Supernatants were removed to a new glass culture  
827 tube and evaporated to dryness under N<sub>2</sub> gas, re-suspended in 300 µl of acetonitrile to  
828 recapture any lipids adhering to the tube and re-dried again under N<sub>2</sub> gas. The final lipid  
829 extracts were suspended in 200 µl of acetonitrile and stored at -80°C until analysis. AEA  
830 contents within lipid extracts were determined using isotope-dilution, liquid  
831 chromatography-tandem mass spectrometry (LC-MS/MS) as previously described (Qi et  
832 al., 2015).

833 *Fluorescent anandamide (CAY10455) uptake:* HEK293T cells (from ATCC) were  
834 transfected with a plasmid encoding rat Panx1 and cultured for 48 hours. Cells were  
835 seeded on poly-lysine coated coverslips and grown to confluence. Anandamide uptake  
836 was assayed under continuous flow conditions with the fluorescent analog CAY10455  
837 (5µM). Cells were imaged at 1Hz for 20 minutes with 488nm excitation and 506-560nm  
838 emission. AEA uptake was calculated as the change in fluorescence over baseline ( $\Delta F/F_0$ ).  
839 Panx1 channels were blocked by pre-incubating cells with <sup>10</sup>panx1 peptide or a scrambled  
840 control (100µM) for 20 minutes prior to CAY10455 perfusion.

841 *Electron Microscopy:* 5 TRPV1-WT and 5 TRPV1-KO adult mice of either sex were used in  
842 this study. TRPV1-deficient mice (C57BL/6J background; <sup>66</sup>) were originally from The  
843 Jackson Laboratory (Strain Name: B6.129X1-*Trpv1tm1Jul/J*), Bar Harbor, ME).  
844 Experimental animals were genotyped by polymerase chain reaction (PCR) under  
845 standard buffer conditions using the primer pair 5'-CCT GCT CAA CAT GCT CAT TG-3' and  
846 5'-TCC TCA TGC ACT TCA GGA AA -3' for the wild-type locus. The primer pair 5'- CAC GAG  
847 ACT AGT GAG ACG TG -3'and 5'-TCC TCA TGC ACT TCA GGA AA -3' was used to detect a  
848 fragment in the Neo cassette, specific for the mutant TRPV1 locus. All four primers were

849 used together in the reaction mix (94°C/3min; 35x[94°C/30 sec, 64°C/1 min, 72°C/1  
850 min]; 1x72°C/2 min; 1x10°C hold).

851 Homozygous TRPV1<sup>-/-</sup> and wild-type littermates (TRPV1<sup>+/+</sup>) from heterozygous  
852 breedings were used for experiments. They were deeply anesthetized by intraperitoneal  
853 injection of ketamine/xylazine (80/10 mg/kg body weight) and then transcardially  
854 perfused at room temperature (RT) with phosphate buffered saline (PBS 0.1M, pH 7.4) for  
855 20 seconds, followed by the fixative solution made up of 4% formaldehyde (freshly  
856 depolymerized from paraformaldehyde), 0.2% picric acid and 0.1% glutaraldehyde in  
857 phosphate buffer (PB 0.1M, pH 7.4) for 10-15 minutes. Brains were then removed from  
858 the skull and postfixed in the fixative solution for approximately one week at 4°C.  
859 Afterwards, brains were stored at 4°C in 1:10 diluted fixative solution until used.

860 *Preembedding immunogold method for TRPV1 electron microscopy (EM):* Coronal 50µm-  
861 thick hippocampal vibrosections were collected in 0.1M PB at RT. Then, they were  
862 preincubated in a blocking solution of 10% bovine serum albumin (BSA), 0.1% sodium  
863 azide and 0.02% saponine prepared in Tris-HCl buffered saline (TBS 1X, pH 7.4) for 30  
864 minutes at RT. Sections were incubated with the primary goat TRPV1 antibody (1:100,  
865 VR1 (P-19), sc-1249, Santa Cruz Biotechnology) prepared in the blocking solution with  
866 0.004% saponin, for 2 days at 4°C. After several washes, tissue sections were incubated  
867 with 1.4nm gold-labeled rabbit antibody to goat IgG (Fab fragment, 1:100, Nanoprobes  
868 Inc., Yaphank, NY, USA) prepared in the same solution as the primary antibody for 3 hours  
869 at RT. Tissue was washed overnight at 4°C and postfixed in 1% glutaraldehyde for 10  
870 minutes. After several washes with 1% BSA in TBS, gold particles were silver-intensified  
871 with a HQ Silver Kit (Nanoprobes Yaphank, NY, USA) for 12 minutes in the dark. Then,  
872 sections were osmicated, dehydrated and embedded in Epon resin 812. Finally, ultrathin

873 sections were collected on nickel mesh grids, stained with lead citrate and examined in a  
874 PHILIPS EM208S electron microscope. Tissue preparations were photographed by using a  
875 digital camera coupled to the electron microscope. Specificity of the immunostaining was  
876 assessed by incubation of the TRPV1 antiserum in TRPV1-KO hippocampal tissue in the  
877 same conditions as above.

878 *Statistical analysis of TRPV1 in the CA1 hippocampus:* 50 $\mu$ m-thick CA1 hippocampal  
879 sections from TRPV1-WT and TRPV1-KO mice (n=5 each) showing good and reproducible  
880 silver-intensified gold particles were cut at 80nm. Electron micrographs (18,000–  
881 28,000X) were taken from grids (2 mm x 1 mm slot) with ultrathin sections showing  
882 similar labeling intensity indicating that selected areas were at the same depth.

883 Furthermore, to avoid false negatives, only ultrathin sections in the first 1.5  $\mu$ m from the  
884 surface of the tissue block were examined. Positive labeling was considered if at least one  
885 immunoparticle was within approximately 30nm from the plasmalemma.

886 TRPV1 metal particles on axon terminals were visualized and counted in randomly taken  
887 electron micrographs from both animal types. The number of positive terminals was  
888 normalized to the total number of terminals in the images to identify the proportion of  
889 TRPV1-positive profiles in TRPV1-WT versus TRPV1-KO. Results were expressed as  
890 means of independent data points  $\pm$  S.E.M. Statistical analyses were performed using  
891 GraphPad software 5.0 (GraphPad Software Inc, San Diego, USA).

892 Statistical analysis of parametric data (i.e. kindling rate) was determined by one-way  
893 ANOVA with the post hoc Tukey's test. Nonparametric data was analyzed with either the  
894 Wilcoxon matched-pairs signed rank test (for paired data with direct comparisons) or the  
895 Kruskal-Wallis test (with Dunn's multiple comparisons). For both parametric and

896 nonparametric analyses, significance was set at  $p \leq 0.05$ . All results are presented as  
897 means  $\pm$ SEM.  
898 Data Availability: All relevant data are available from the authors.

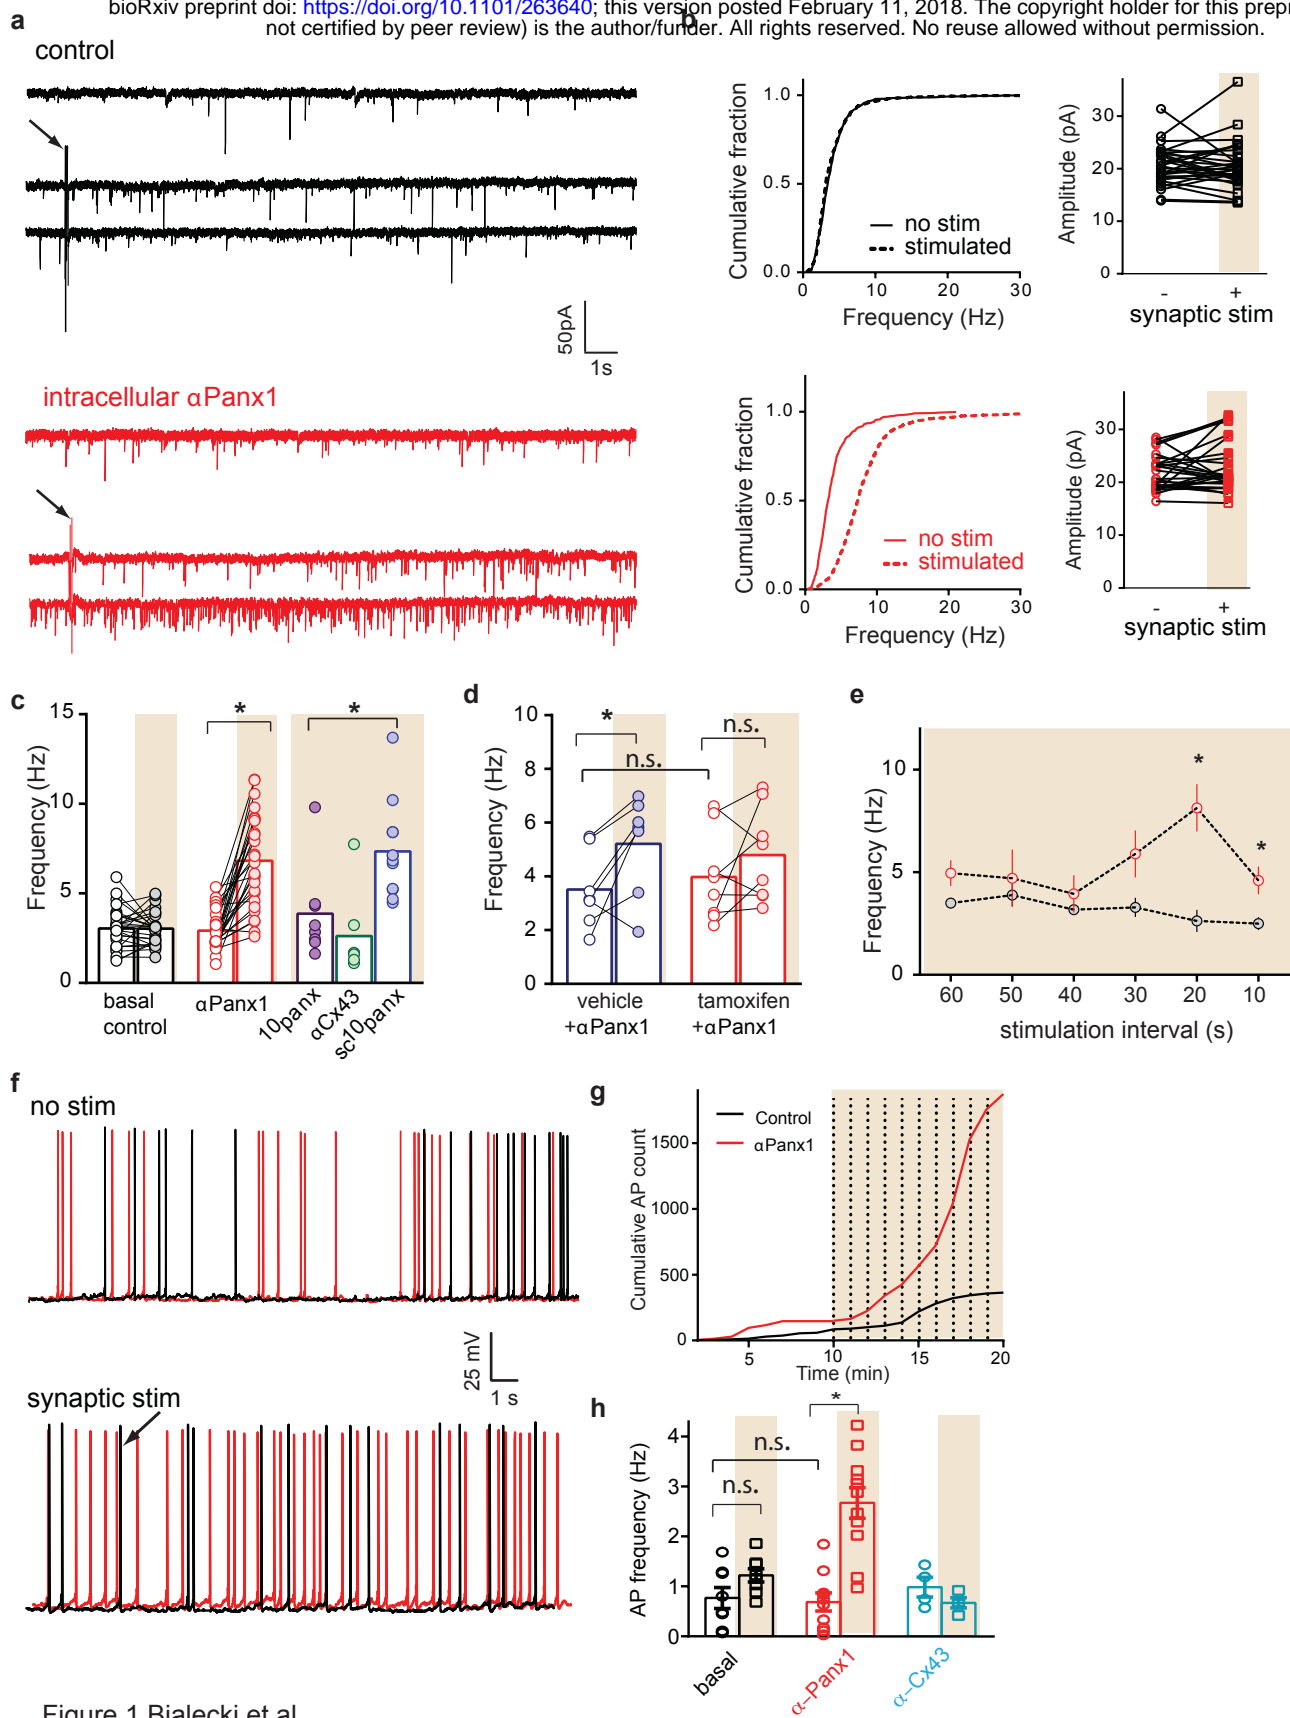

Figure 1 Bialecki et al.,

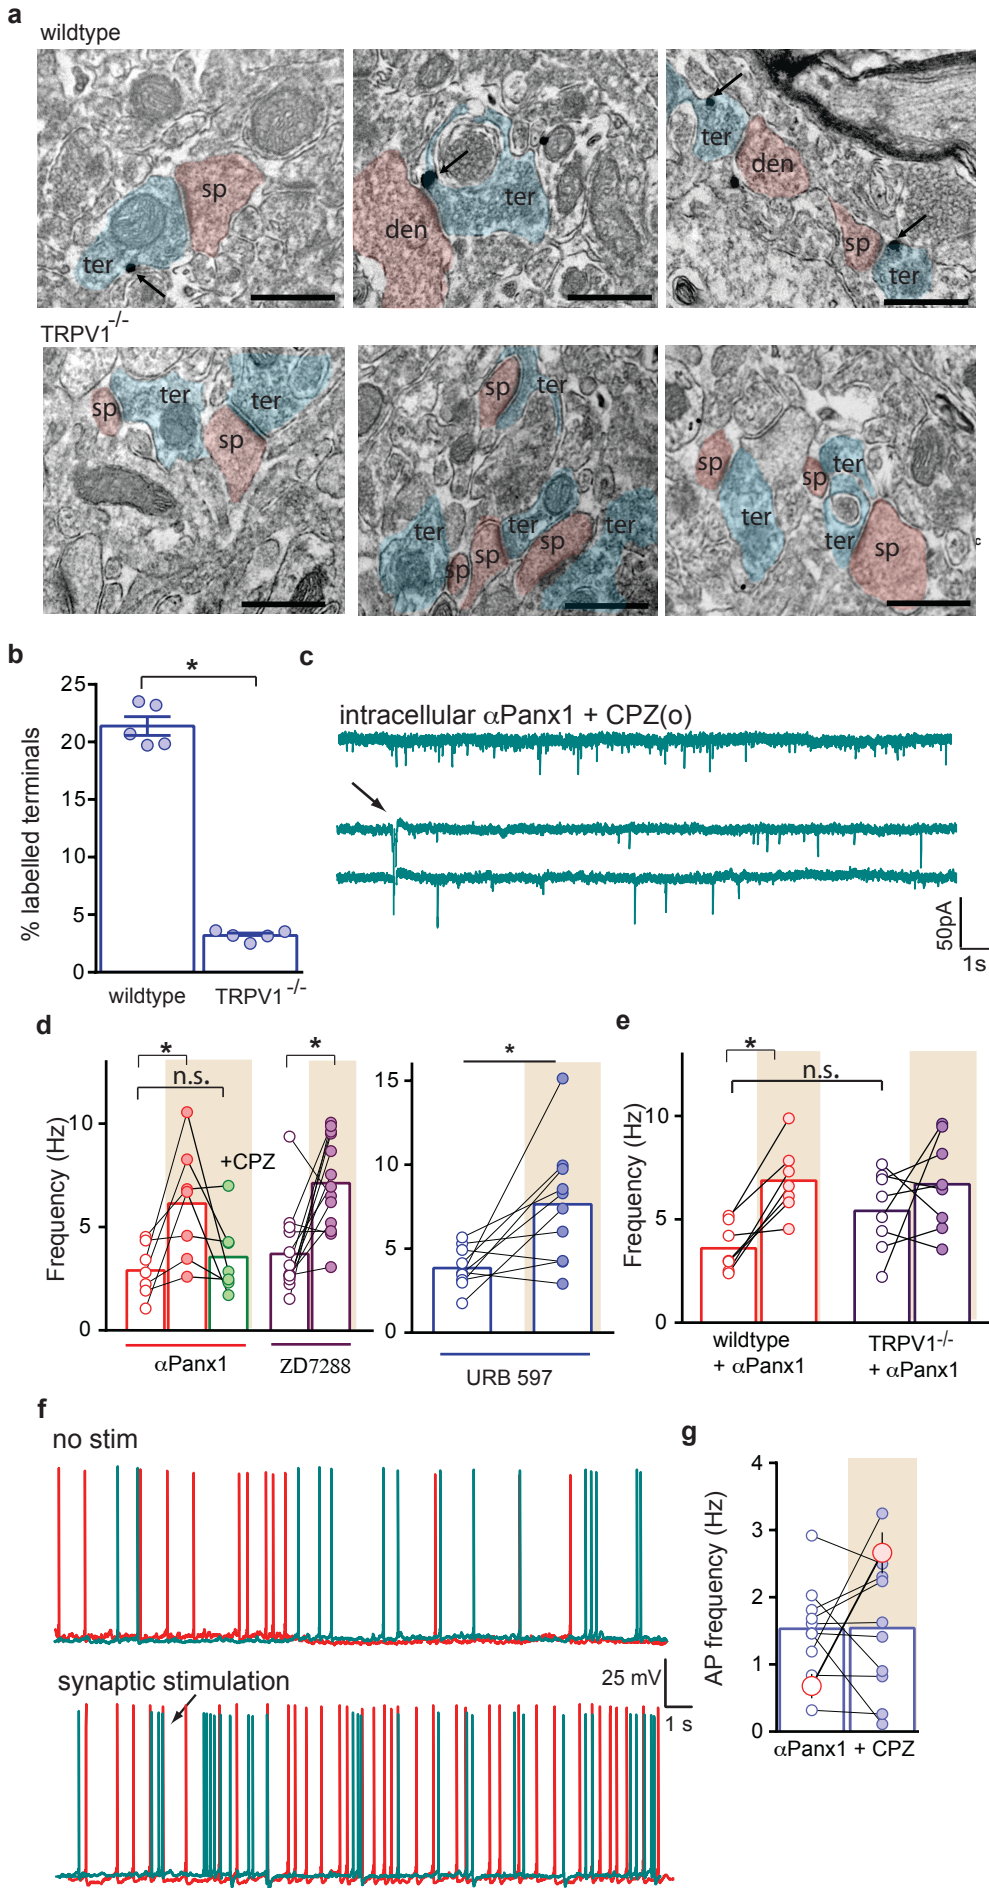

Figure 2 Bialecki et al.,



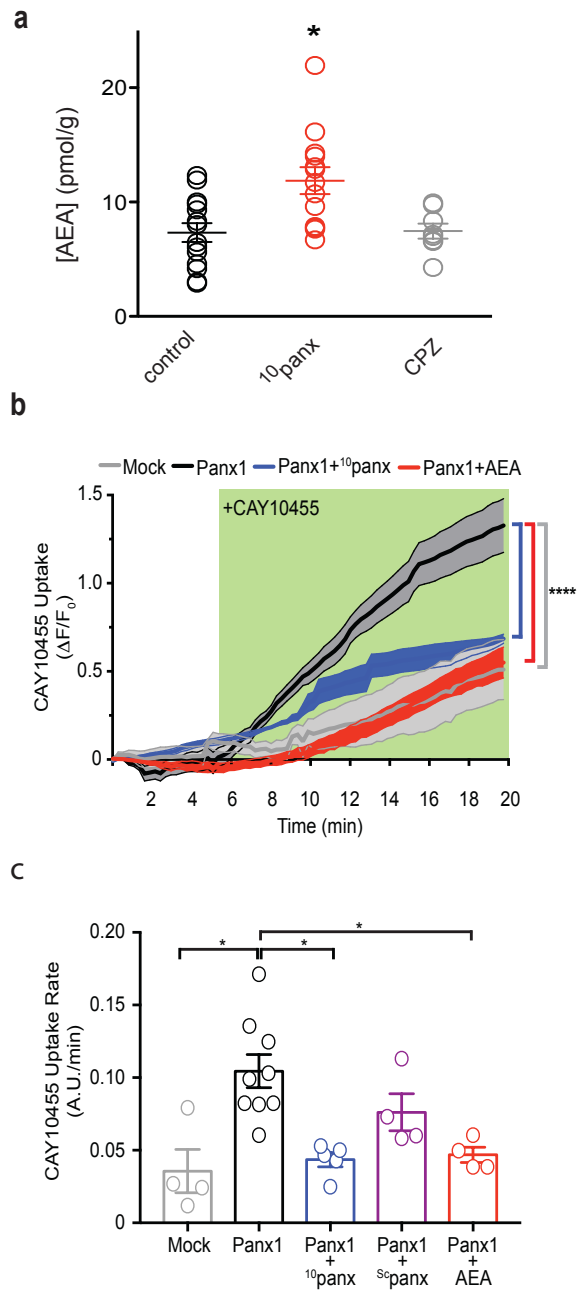

Figure 3 Bialecki et al

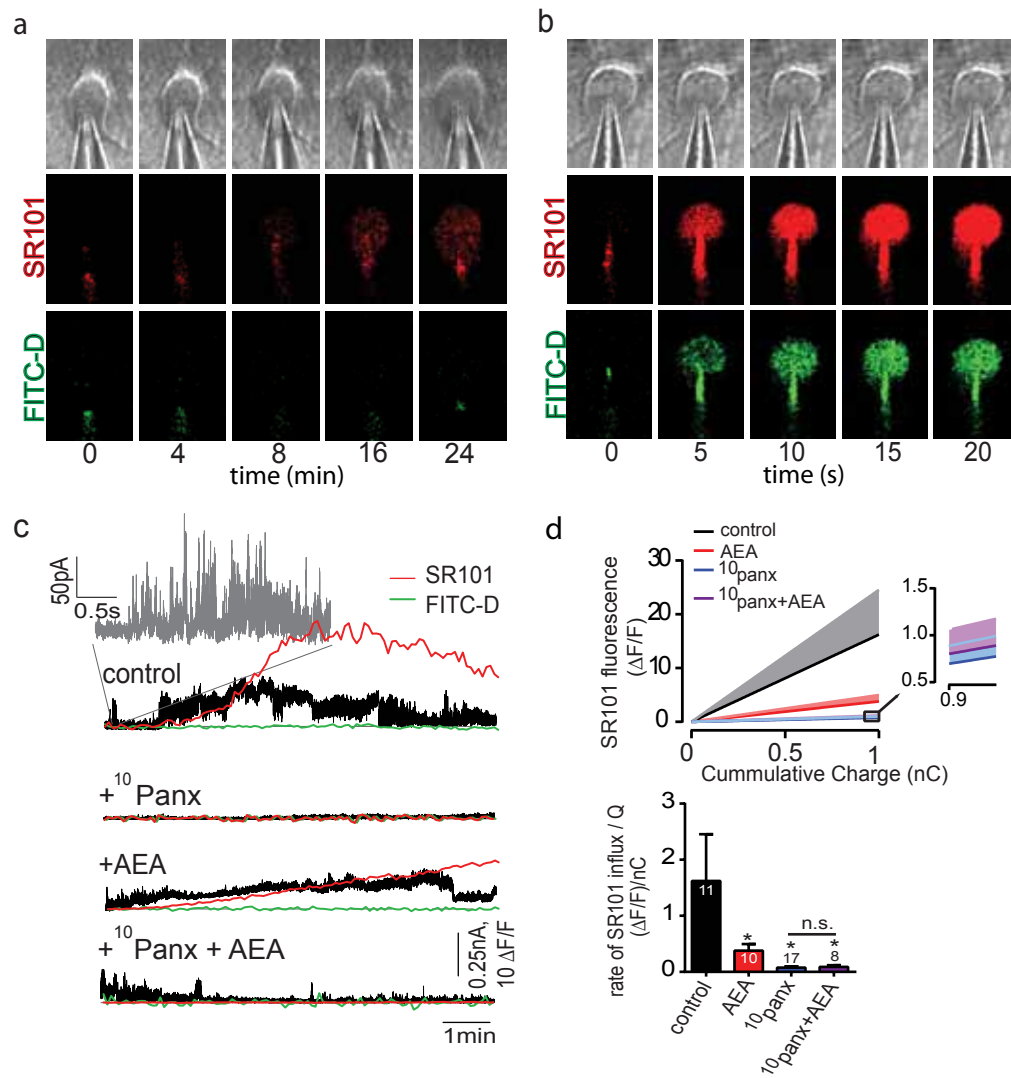

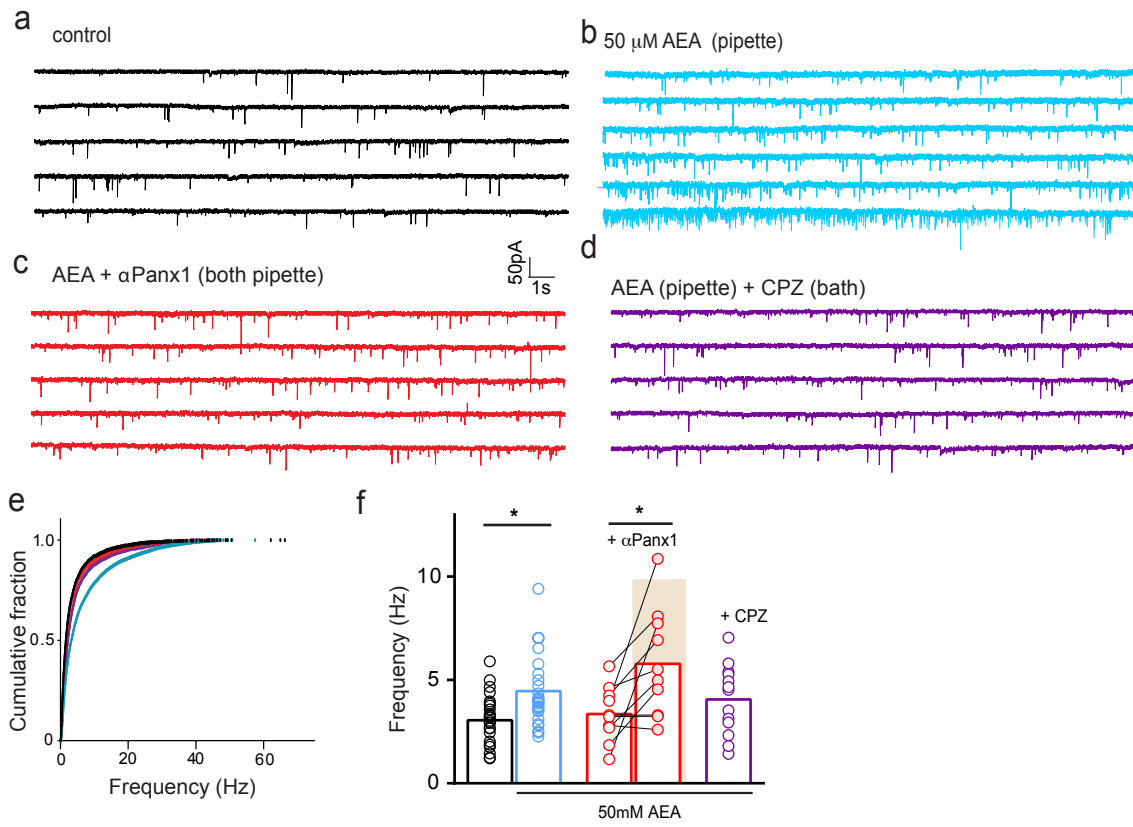

Figure 5 Bialecki et al.

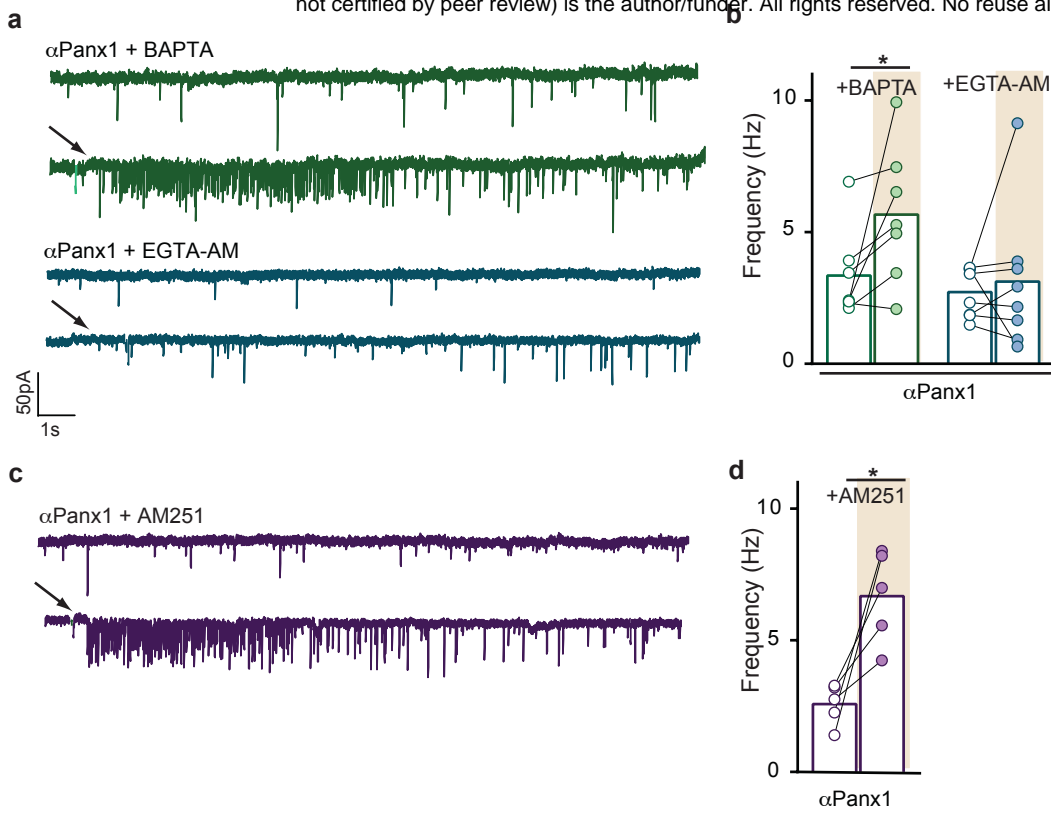

Figure 6 Bialecki et al.,

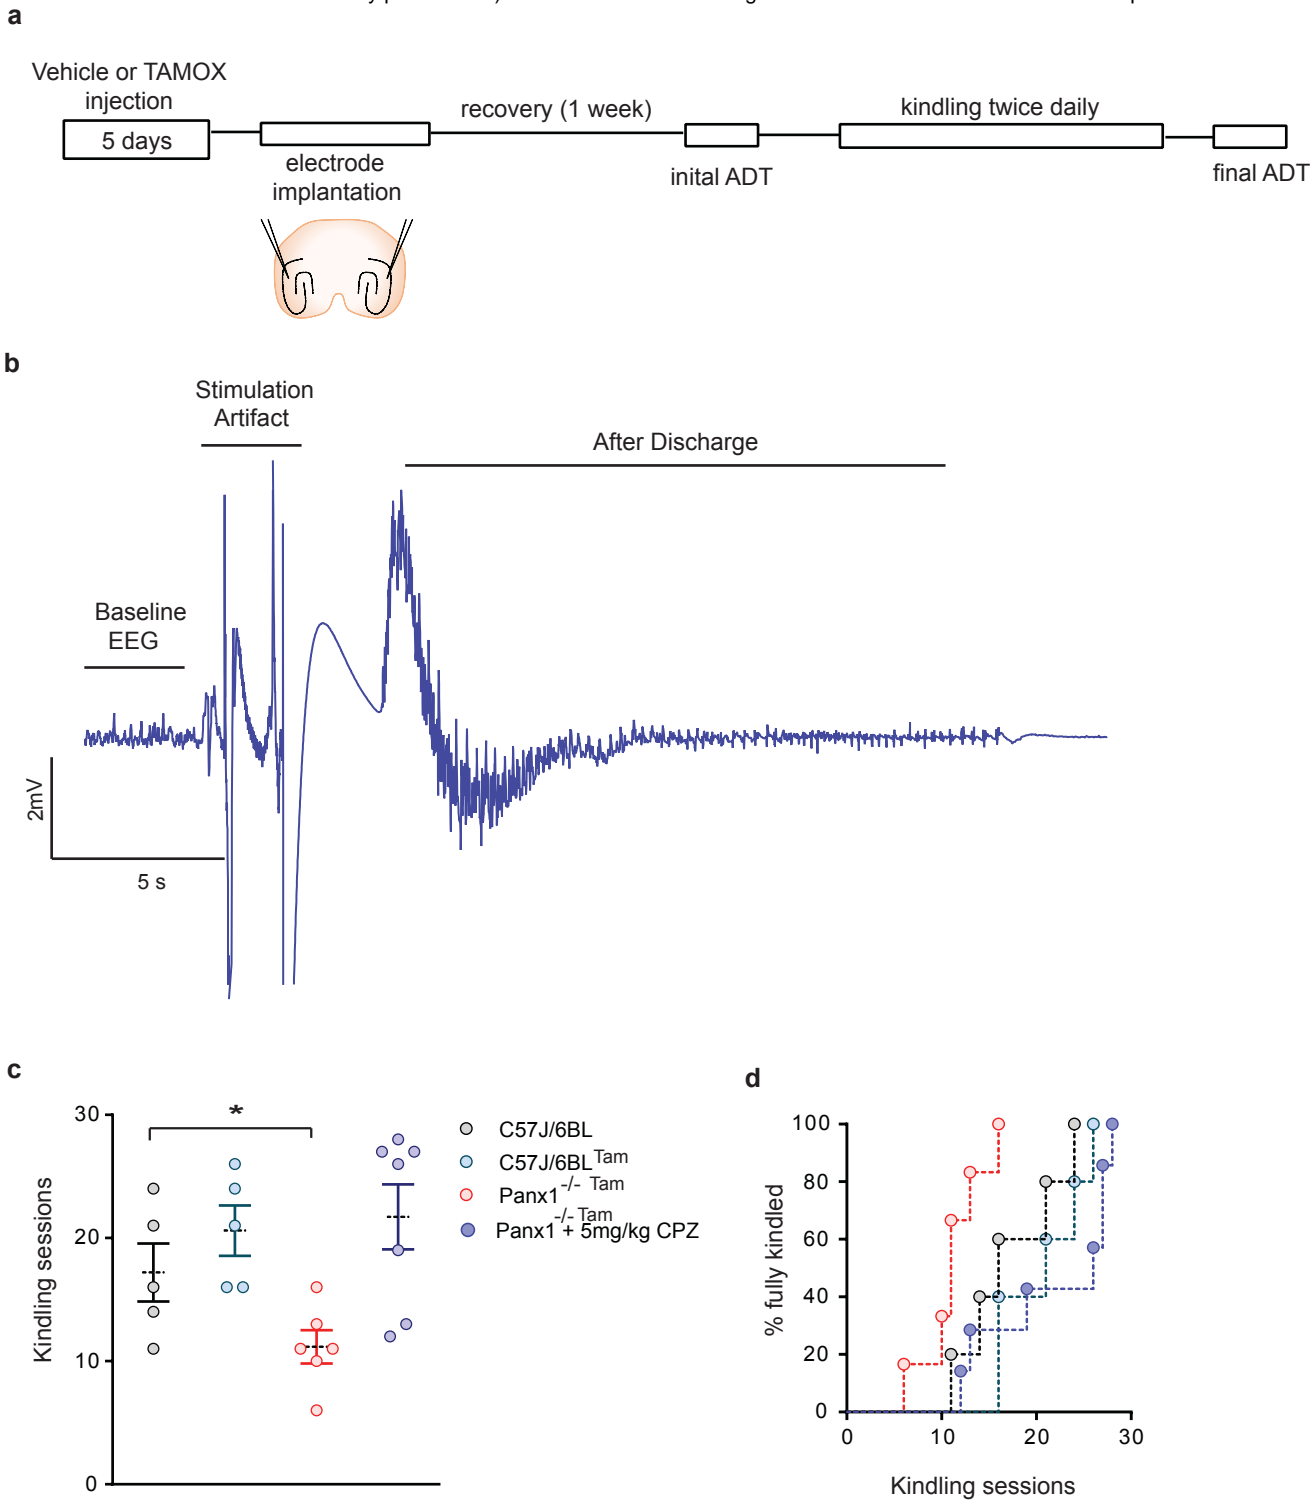

Figure 7 Bialecki et al.,

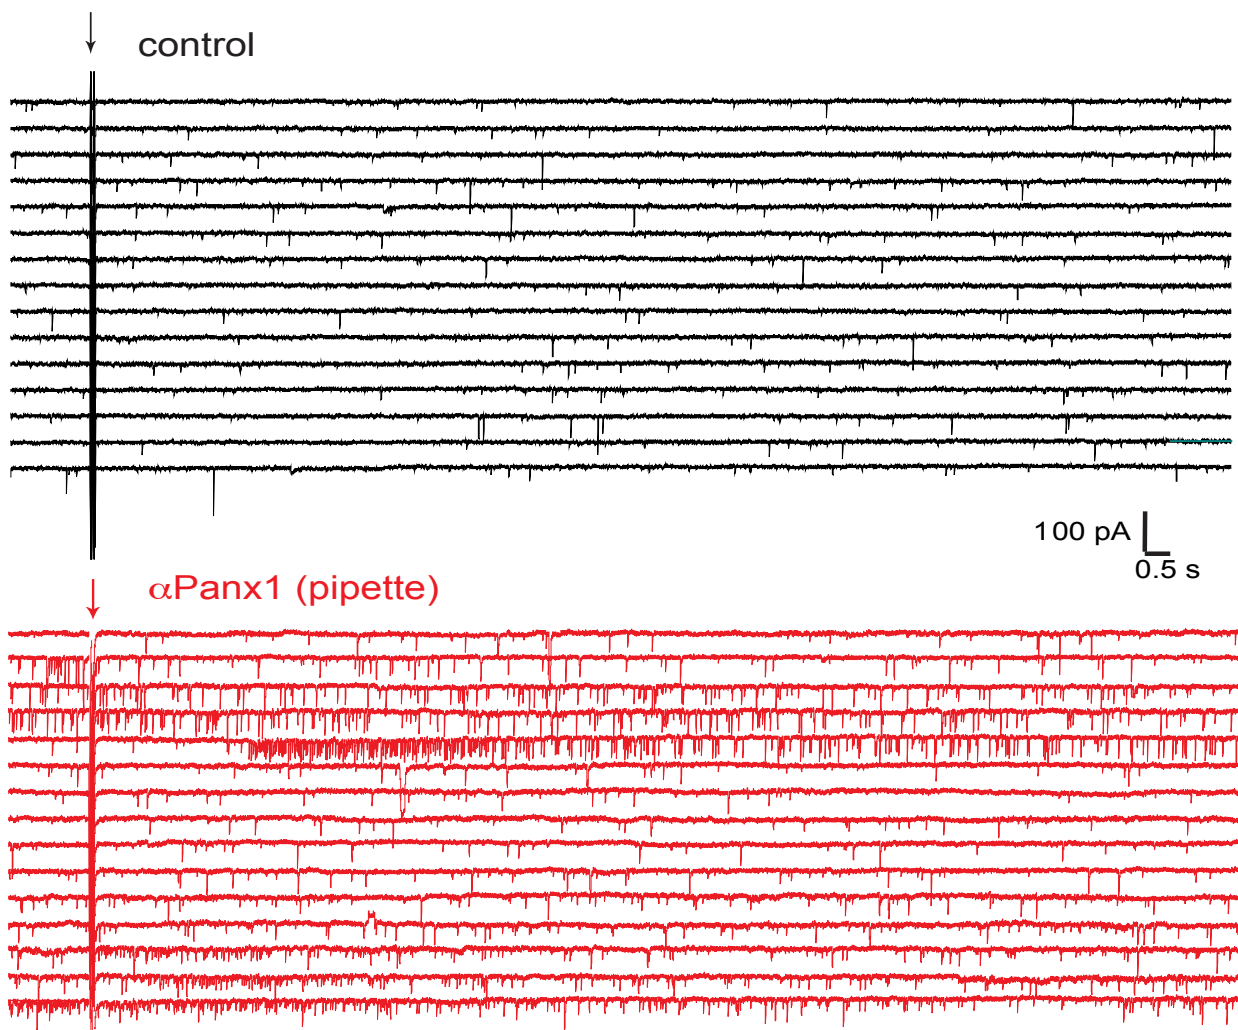

Fig. S1. Continuous voltage-clamp recordings from two neurons under control (black) and with the Panx1 blocking antibody, aPanx1 in the pipette (red). Note that when Panx1 was block periods of prolonged synaptic activity are apparent. Picrotoxin is present to block GABAA receptors.

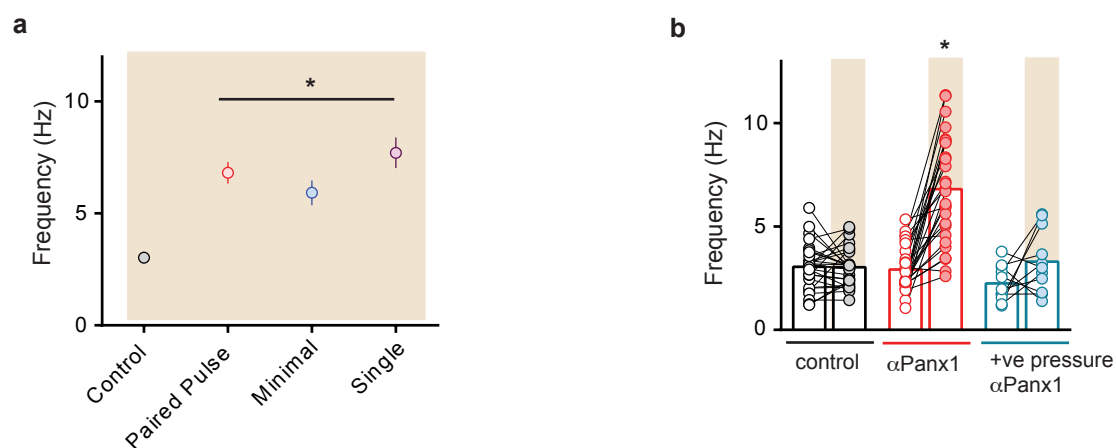

Fig. S2. a) Several stimulation paradigms induce asynchronous release when  $\alpha$ Panx1 is in the patch pipette. Paired pulse stimulations were 1 ms stims given 50 ms apart every 20 s. Minimal stimulation was 1 ms stims every 20 s with a 50% failure rate. Single stims were 1 ms every 20s at 50% of the maximum eEPSC amplitude. b) comparison of the increase in glutamate neurotransmission when  $\alpha$ Panx1 was delivered to the postsynaptic neuron (red) or when it was applied via a patch pipette under positive pressure that was held above the slice. this experiment was to ensure the positive pressure did not result in antibody delivery to adjacent neurons to induce prolonged release.

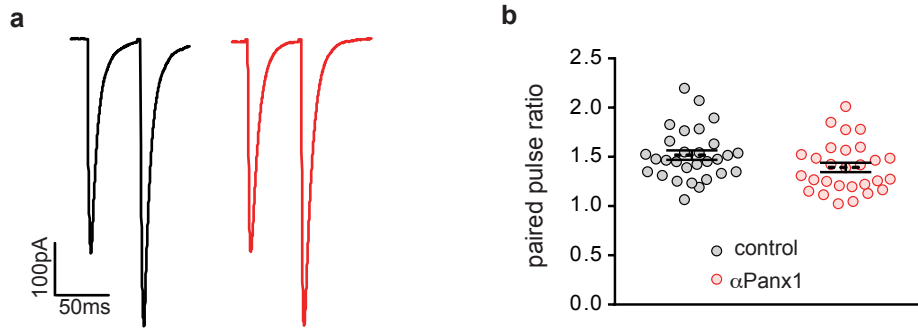

Fig. S3. The paired pulse ratio (PPR) was not altered by the presence of postsynaptic  $\alpha$ Panx1. a) comparison of paired pulse excitatory postsynaptic potentials under control (black) and with  $\alpha$ Panx1 in the pipette (red). b) PPR for all cells tested. Bars are mean  $\pm$  sem.



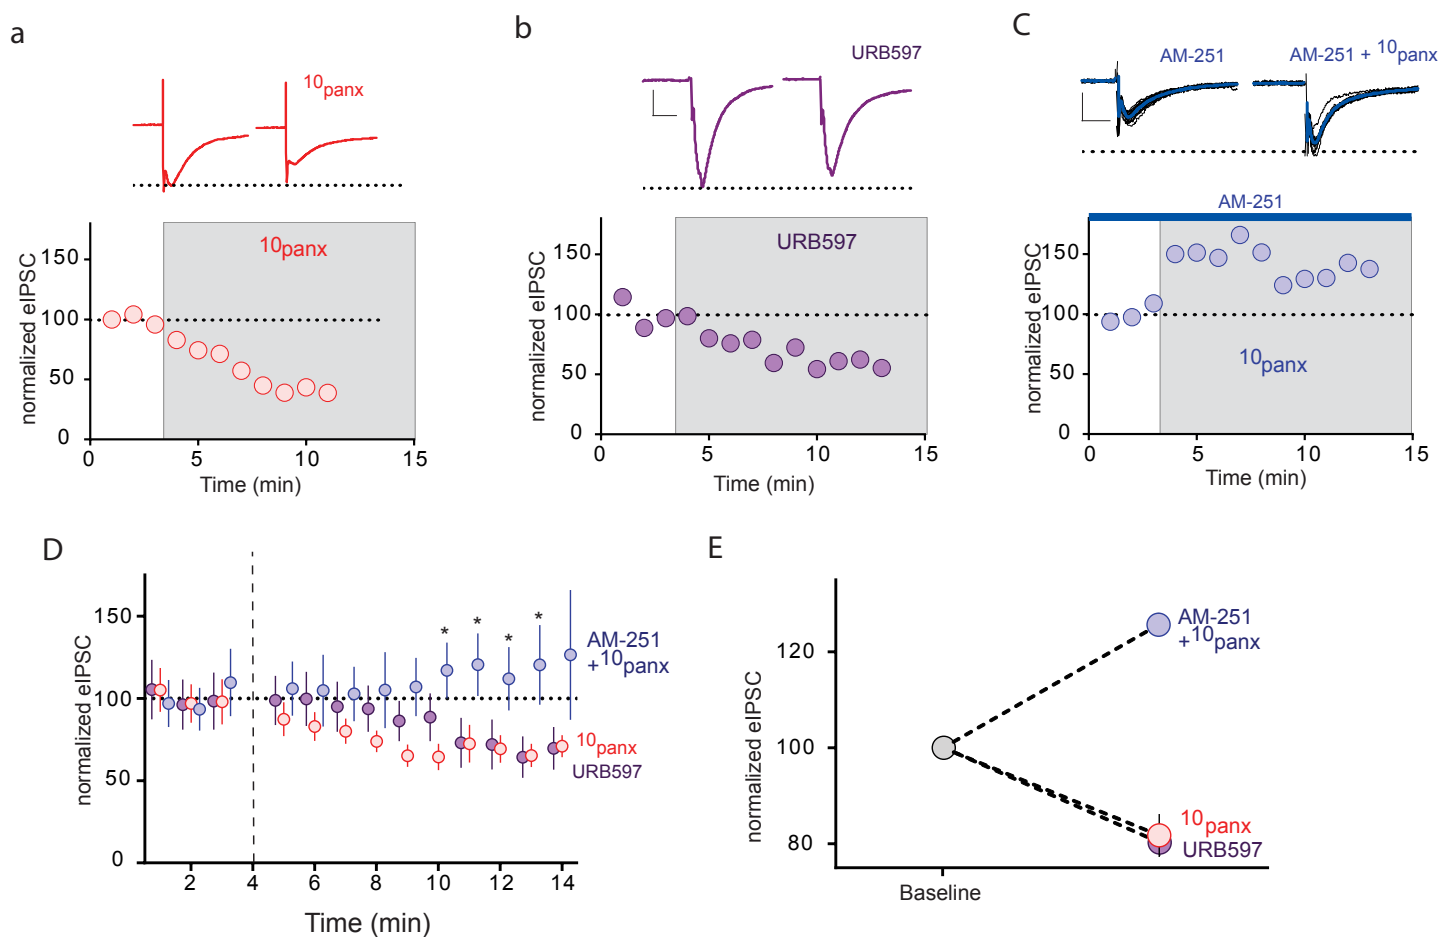

Figure S4. Blocking Panx1 suppresses evoked inhibitory postsynaptic currents that depend upon activation of CB1 receptors. a) Examples of averaged synaptic stimulation induced inhibitory postsynaptic currents (eIPSC) in the absence and presence of the Panx1 blocker, 10panx (100  $\mu$ M). CA1 neurons were held at -70mV. The time course shows amplitude of eIPSC, averaged at 1 min intervals. The shaded region is when 10panx was applied. b) Examples of averaged eIPSC in the presence of 1  $\mu$ M URB597 and the time course of inhibition of evoked responses. c) The CB1R partial agonist, 3  $\mu$ M AM-251 reversed the inhibition of eIPSCs seen in the presence of 10panx. d) Mean  $\pm$  sem eIPSC amplitudes versus time for each blocker. The gap in the time course occurred during solution switching and equilibration with the drug and no synaptic stimulations were applied. \*denotes  $P < 0.05$  by 2 way ANOVA. e) Evoked IPSC amplitudes were averaged for the 9-14 min period presented in D. Note that block of FAAH and Panx1 reduced eIPSC amplitudes. Error bars are hidden by the symbols. Scale bars in a-c are 50 pA and 100 ms.

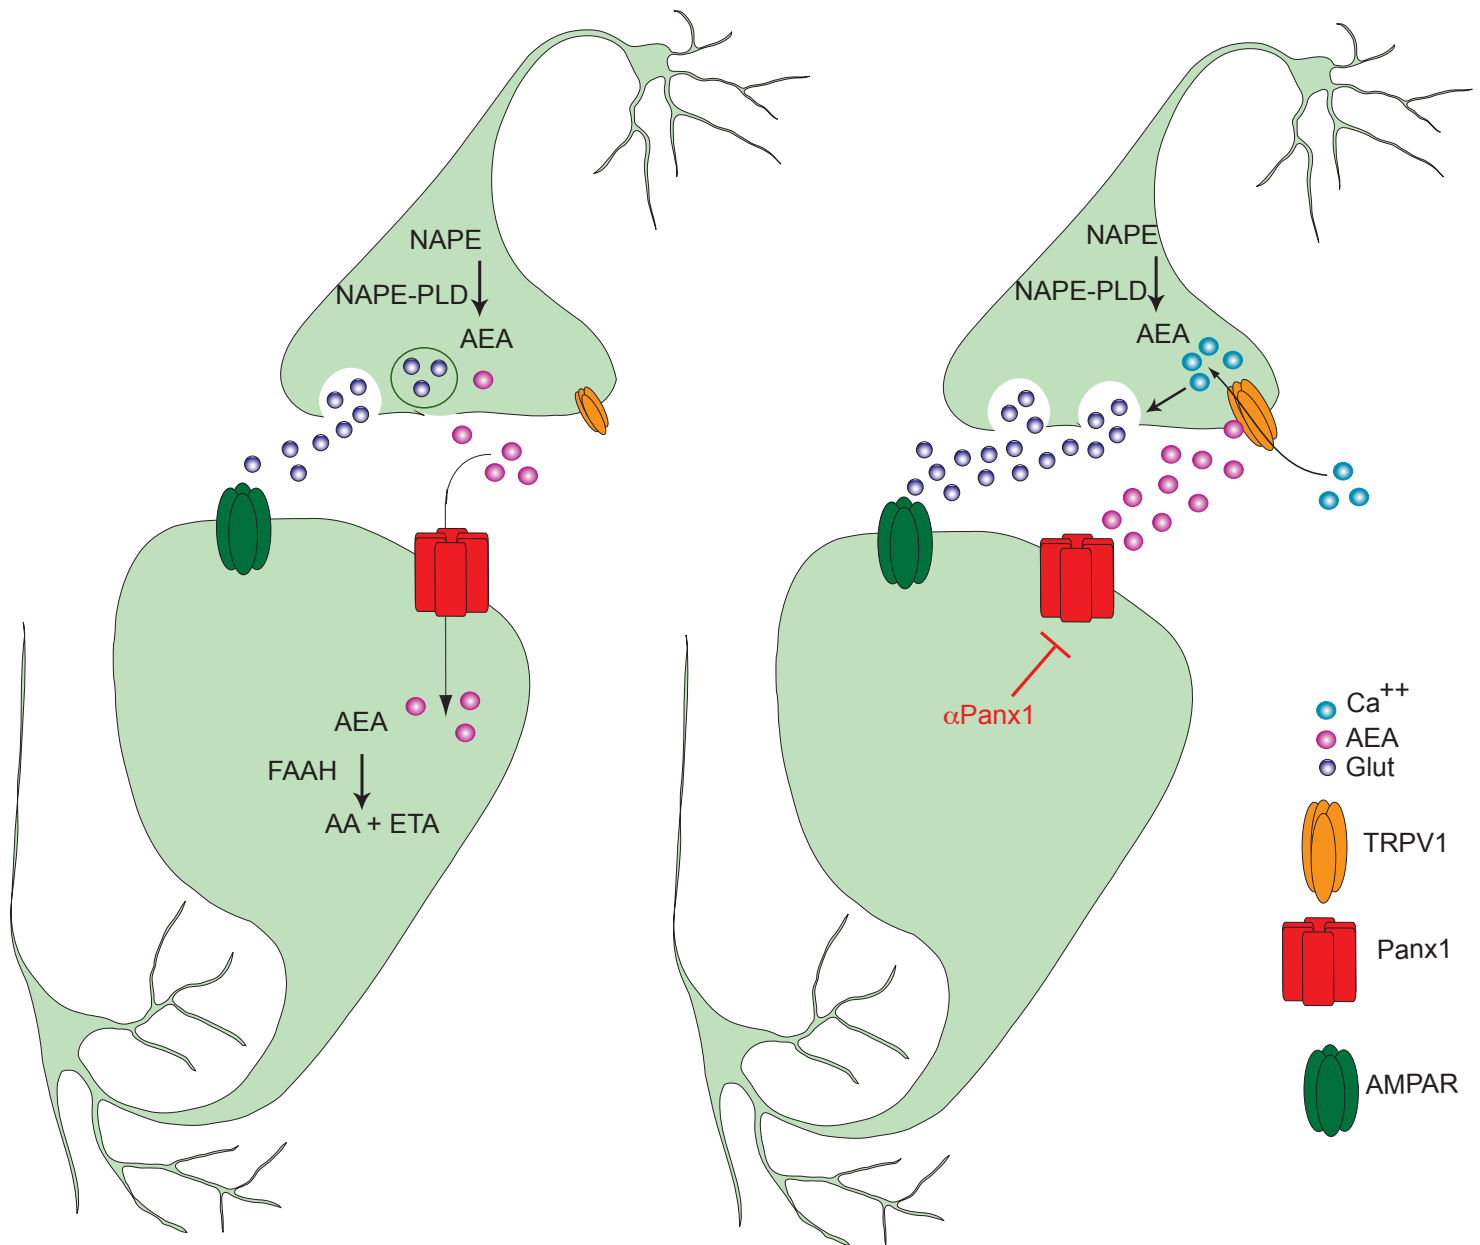

Fig S5. A model of the proposed role of post-synaptic Panx1 and presynaptic TRPV1 in mediating prolonged glutamate release following stimulation. Under basal conditions, AEA is produced in a calcium-dependent way by NAPE-PLD, released and rapidly cleared into postsynaptic neurons via Panx1 for degradation by FAAH. The simplest explanation of our data is that NAPE-PLD is presynaptic, but we cannot completely rule out other glial sources. When Panx1 is blocked, AEA accumulates to activate presynaptic TRPV1 to cause prolonged glutamate release and enhance excitability.
